# Supplementary material for: A multi-scale approach to spin crossover in Fe(ii) compounds
Source: Royal Society of Chemistry journal article supplement (doi:10.1039/c1cp20646j), 2011-01-01
Supplement: c1cp20646j.pdf [file c1cp20646j.pdf]

## A multi-scale approach to spin crossover in Fe(II) compounds

Marcel Swart,<sup>\*a,b</sup> Mireia Güell<sup>a</sup> and Miquel Solà<sup>a</sup>

<sup>a</sup> Institut de Química Computacional and Departament de Química, Universitat de Girona, Campus Montilivi, Girona, Spain

<sup>b</sup> Institució Catalana de Recerca i Estudis Avançats (ICREA), Pg. Lluís Companys 23, Barcelona, Spain. E-mail: marcel.swart@icrea.cat

|                                                                                           |       |
|-------------------------------------------------------------------------------------------|-------|
| Table S1. Vibrational frequencies from OPBE/TZP and IntraFF force field parameters        | p. S2 |
| Table S2. Macroscopic density of dichloromethane and box-radius at different temperatures | p. S5 |
| Force field parameters for iron-compound in low and high state                            | p. S6 |

**Table S1.** Vibrational frequencies<sup>a</sup> (cm<sup>-1</sup>) from OPBE/TZP and IntraFF force field parameters

| Freq. | IntraFF | OPBE/TZP<br>singlet | <i>diff.</i> | IntraFF | OPBE/TZP<br>quintet | <i>diff.</i> |
|-------|---------|---------------------|--------------|---------|---------------------|--------------|
| 7     | 86.5    | 57.3                | 29.1         | 78.6    | 37.2                | 41.4         |
| 8     | 111.3   | 64.1                | 47.2         | 107.8   | 54.0                | 53.9         |
| 9     | 111.3   | 64.1                | 47.2         | 107.8   | 54.0                | 53.9         |
| 10    | 131.5   | 76.5                | 54.9         | 128.6   | 55.6                | 73.0         |
| 11    | 131.5   | 76.5                | 54.9         | 128.6   | 55.6                | 73.0         |
| 12    | 137.9   | 78.7                | 59.2         | 133.6   | 58.4                | 75.1         |
| 13    | 137.9   | 78.7                | 59.2         | 133.6   | 58.4                | 75.1         |
| 14    | 171.4   | 121.5               | 50.0         | 164.0   | 75.4                | 88.6         |
| 15    | 179.1   | 144.1               | 35.1         | 177.1   | 91.2                | 85.9         |
| 16    | 197.2   | 158.0               | 39.2         | 194.7   | 104.7               | 89.9         |
| 17    | 198.6   | 163.7               | 34.9         | 194.7   | 104.7               | 89.9         |
| 18    | 198.6   | 176.9               | 21.7         | 195.7   | 110.7               | 85.0         |
| 19    | 202.0   | 176.9               | 25.1         | 198.4   | 133.2               | 65.2         |
| 20    | 202.0   | 182.5               | 19.5         | 198.4   | 133.2               | 65.2         |
| 21    | 236.5   | 182.5               | 54.0         | 224.7   | 133.4               | 91.3         |
| 22    | 236.5   | 203.4               | 33.1         | 224.7   | 133.4               | 91.3         |
| 23    | 270.5   | 203.4               | 67.1         | 257.2   | 155.4               | 101.8        |
| 24    | 283.1   | 211.1               | 72.0         | 275.5   | 162.0               | 113.5        |
| 25    | 295.9   | 242.0               | 53.9         | 282.3   | 168.0               | 114.3        |
| 26    | 307.1   | 256.0               | 51.1         | 301.1   | 191.1               | 110.0        |
| 27    | 310.6   | 317.0               | -6.3         | 307.7   | 191.1               | 116.5        |
| 28    | 318.6   | 317.0               | 1.7          | 316.1   | 197.1               | 119.0        |
| 29    | 318.7   | 328.9               | -10.2        | 316.1   | 242.1               | 74.0         |
| 30    | 326.5   | 328.9               | -2.4         | 323.7   | 276.0               | 47.7         |
| 31    | 326.5   | 334.2               | -7.8         | 323.7   | 276.0               | 47.7         |
| 32    | 386.9   | 340.7               | 46.2         | 376.1   | 280.6               | 95.5         |
| 33    | 425.9   | 340.7               | 85.2         | 399.9   | 280.6               | 119.3        |
| 34    | 426.0   | 347.3               | 78.7         | 399.9   | 321.2               | 78.8         |
| 35    | 478.5   | 347.3               | 131.2        | 473.9   | 321.2               | 152.7        |
| 36    | 487.6   | 354.9               | 132.7        | 479.3   | 325.7               | 153.6        |
| 37    | 487.6   | 411.0               | 76.5         | 479.3   | 325.8               | 153.5        |
| 38    | 487.8   | 411.0               | 76.8         | 482.7   | 325.8               | 156.9        |
| 39    | 488.0   | 430.9               | 57.1         | 482.8   | 327.9               | 154.8        |
| 40    | 506.3   | <b>613.3</b>        | -107.0       | 501.8   | <b>617.1</b>        | -115.3       |
| 41    | 506.3   | <b>617.2</b>        | -110.9       | 501.9   | <b>620.1</b>        | -118.3       |
| 42    | 515.4   | <b>619.4</b>        | -104.0       | 505.0   | <b>620.9</b>        | -115.9       |
| 43    | 525.4   | <b>619.4</b>        | -94.0        | 506.0   | <b>620.9</b>        | -114.9       |
| 44    | 545.9   | <b>622.4</b>        | -76.5        | 532.8   | <b>628.9</b>        | -96.1        |
| 45    | 545.9   | <b>622.4</b>        | -76.4        | 532.9   | <b>628.9</b>        | -96.0        |
| 46    | 637.6   | <b>655.3</b>        | -17.7        | 648.1   | <b>663.6</b>        | -15.5        |
| 47    | 637.7   | 668.3               | -30.6        | 648.4   | 664.9               | -16.5        |
| 48    | 643.0   | <b>669.6</b>        | -26.6        | 664.0   | <b>674.9</b>        | -10.9        |
| 49    | 643.0   | <b>669.6</b>        | -26.6        | 664.2   | <b>674.9</b>        | -10.7        |
| 50    | 661.1   | 679.3               | -18.2        | 685.5   | 679.1               | 6.4          |
| 51    | 670.7   | 679.3               | -8.6         | 695.1   | 679.1               | 16.0         |
| 52    | 692.4   | <b>721.1</b>        | -28.7        | 700.1   | <b>731.1</b>        | -31.0        |
| 53    | 701.5   | <b>721.1</b>        | -19.6        | 700.3   | <b>731.1</b>        | -30.8        |
| 54    | 701.6   | <b>722.9</b>        | -21.3        | 714.4   | <b>733.1</b>        | -18.7        |
| 55    | 718.6   | <b>722.9</b>        | -4.4         | 715.2   | <b>733.1</b>        | -17.9        |
| 56    | 728.3   | <b>728.8</b>        | -0.6         | 720.7   | <b>742.0</b>        | -21.2        |
| 57    | 742.8   | <b>732.9</b>        | 9.9          | 720.9   | <b>745.1</b>        | -24.2        |
| 58    | 742.8   | <b>733.9</b>        | 8.8          | 726.0   | <b>746.6</b>        | -20.6        |
| 59    | 748.3   | <b>733.9</b>        | 14.4         | 732.0   | <b>746.6</b>        | -14.6        |
| 60    | 752.2   | <b>736.5</b>        | 15.7         | 764.4   | <b>748.3</b>        | 16.0         |
| 61    | 752.3   | <b>736.5</b>        | 15.8         | 764.4   | <b>748.3</b>        | 16.0         |
| 62    | 754.3   | 800.2               | -45.8        | 770.3   | 783.4               | -13.1        |
| 63    | 754.4   | 801.1               | -46.7        | 770.3   | 785.4               | -15.1        |
| 64    | 782.9   | <b>807.8</b>        | -24.9        | 803.9   | <b>827.4</b>        | -23.5        |
| 65    | 782.9   | <b>811.6</b>        | -28.7        | 804.0   | <b>830.0</b>        | -26.0        |
| 66    | 787.6   | <b>811.6</b>        | -24.0        | 804.1   | <b>830.6</b>        | -26.5        |
| 67    | 787.6   | <b>811.8</b>        | -24.2        | 804.6   | <b>830.6</b>        | -25.9        |
| Freq. | IntraFF | OPBE/TZP            | <i>diff.</i> | IntraFF | OPBE/TZP            | <i>diff.</i> |

|       | singlet |                     |       | quintet |                     |       |
|-------|---------|---------------------|-------|---------|---------------------|-------|
| 68    | 800.4   | <b>811.9</b>        | -11.6 | 804.8   | <b>831.8</b>        | -27.0 |
| 69    | 814.6   | <b>811.9</b>        | 2.7   | 816.9   | <b>831.8</b>        | -15.0 |
| 70    | 848.3   | <b>857.4</b>        | -9.1  | 836.2   | <b>869.6</b>        | -33.4 |
| 71    | 848.3   | <b>858.5</b>        | -10.2 | 836.2   | <b>871.0</b>        | -34.8 |
| 72    | 850.8   | <b>858.7</b>        | -7.9  | 841.7   | <b>871.0</b>        | -29.3 |
| 73    | 850.8   | <b>858.7</b>        | -7.9  | 841.7   | <b>873.1</b>        | -31.3 |
| 74    | 854.6   | <b>858.9</b>        | -4.3  | 870.4   | <b>873.5</b>        | -3.1  |
| 75    | 859.0   | <b>858.9</b>        | 0.1   | 875.8   | <b>873.5</b>        | 2.3   |
| 76    | 884.8   | 912.5               | -27.7 | 895.6   | 910.9               | -15.3 |
| 77    | 884.9   | 912.5               | -27.6 | 898.5   | 910.9               | -12.4 |
| 78    | 888.8   | 912.7               | -24.0 | 898.6   | 911.8               | -13.2 |
| 79    | 888.8   | 912.7               | -23.9 | 901.7   | 911.8               | -10.1 |
| 80    | 896.4   | 919.0               | -22.6 | 905.2   | 915.8               | -10.6 |
| 81    | 899.6   | 919.3               | -19.8 | 905.2   | 916.6               | -11.4 |
| 82    | 903.4   | 977.5               | -74.2 | 926.8   | 976.6               | -49.7 |
| 83    | 920.4   | 977.5               | -57.1 | 932.6   | 977.7               | -45.2 |
| 84    | 920.5   | <b>978.8</b>        | -58.3 | 932.8   | <b>979.6</b>        | -46.8 |
| 85    | 933.6   | <b>978.8</b>        | -45.1 | 936.4   | <b>979.6</b>        | -43.2 |
| 86    | 951.1   | 980.3               | -29.2 | 937.4   | 980.3               | -42.9 |
| 87    | 951.1   | 986.7               | -35.5 | 937.6   | 980.3               | -42.7 |
| 88    | 992.5   | <b>1042.5</b>       | -50.0 | 985.5   | <b>1052.8</b>       | -67.3 |
| 89    | 992.5   | <b>1042.5</b>       | -50.0 | 985.7   | <b>1052.8</b>       | -67.2 |
| 90    | 994.2   | <b>1042.5</b>       | -48.3 | 997.7   | <b>1055.7</b>       | -58.0 |
| 91    | 994.6   | <b>1042.5</b>       | -47.9 | 997.7   | <b>1055.7</b>       | -58.0 |
| 92    | 1000.6  | <b>1063.8</b>       | -63.2 | 1003.3  | <b>1065.1</b>       | -61.8 |
| 93    | 1000.6  | <b>1065.4</b>       | -64.8 | 1003.3  | <b>1066.8</b>       | -63.5 |
| 94    | 1010.1  | <b>1065.4</b>       | -55.3 | 1010.2  | <b>1071.3</b>       | -61.1 |
| 95    | 1017.2  | <b>1067.4</b>       | -50.2 | 1014.9  | <b>1071.3</b>       | -56.4 |
| 96    | 1017.8  | <b>1067.4</b>       | -49.6 | 1017.8  | <b>1072.1</b>       | -54.3 |
| 97    | 1017.8  | <b>1071.2</b>       | -53.4 | 1017.8  | <b>1072.1</b>       | -54.3 |
| 98    | 1021.1  | 1093.3              | -72.2 | 1021.6  | 1092.2              | -70.6 |
| 99    | 1021.1  | 1101.0              | -79.8 | 1021.6  | 1094.2              | -72.6 |
| 100   | 1092.8  | <b>1124.5</b>       | -31.7 | 1090.8  | <b>1128.7</b>       | -37.9 |
| 101   | 1092.8  | <b>1124.5</b>       | -31.7 | 1090.8  | <b>1128.7</b>       | -37.9 |
| 102   | 1093.6  | <b>1125.3</b>       | -31.8 | 1092.3  | <b>1128.9</b>       | -36.6 |
| 103   | 1093.6  | <b>1125.3</b>       | -31.8 | 1092.3  | <b>1128.9</b>       | -36.6 |
| 104   | 1130.6  | 1189.7              | -59.1 | 1127.7  | 1187.0              | -59.3 |
| 105   | 1134.8  | 1189.7              | -54.9 | 1131.2  | 1187.0              | -55.8 |
| 106   | 1175.2  | 1193.3              | -18.1 | 1173.9  | 1189.3              | -15.5 |
| 107   | 1175.2  | 1193.3              | -18.1 | 1173.9  | 1189.3              | -15.5 |
| 108   | 1185.5  | 1197.6              | -12.1 | 1181.4  | 1194.4              | -13.0 |
| 109   | 1185.5  | 1198.1              | -12.5 | 1181.4  | 1195.5              | -14.1 |
| 110   | 1242.3  | <b>1237.3</b>       | 5.0   | 1238.3  | <b>1243.3</b>       | -5.0  |
| 111   | 1243.5  | <b>1237.3</b>       | 6.2   | 1238.5  | <b>1245.4</b>       | -7.0  |
| 112   | 1280.5  | <b>1237.8</b>       | 42.8  | 1288.7  | <b>1245.5</b>       | 43.3  |
| 113   | 1280.5  | <b>1237.8</b>       | 42.8  | 1288.7  | <b>1246.4</b>       | 42.4  |
| 114   | 1286.8  | <b>1242.6</b>       | 44.2  | 1294.0  | <b>1246.7</b>       | 47.3  |
| 115   | 1286.8  | 1246.6              | 40.2  | 1294.0  | 1246.7              | 47.3  |
| 116   | 1330.7  | 1333.3              | -2.6  | 1328.1  | 1332.1              | -4.0  |
| 117   | 1330.7  | 1333.3              | -2.6  | 1328.1  | 1332.6              | -4.5  |
| 118   | 1332.1  | 1338.2              | -6.1  | 1329.8  | 1332.6              | -2.8  |
| 119   | 1332.1  | 1338.2              | -6.1  | 1329.8  | 1333.0              | -3.2  |
| 120   | 1382.2  | 1338.2              | 43.9  | 1377.7  | 1333.9              | 43.9  |
| 121   | 1382.4  | 1338.8              | 43.6  | 1378.8  | 1333.9              | 44.9  |
| 122   | 1439.8  | 1433.4              | 6.4   | 1429.2  | 1419.0              | 10.2  |
| 123   | 1439.8  | 1433.4              | 6.4   | 1429.2  | 1419.0              | 10.2  |
| 124   | 1441.7  | 1435.9              | 5.8   | 1430.7  | 1419.4              | 11.3  |
| 125   | 1441.7  | 1435.9              | 5.8   | 1430.7  | 1419.4              | 11.3  |
| 126   | 1447.2  | 1444.6              | 2.6   | 1443.9  | 1439.5              | 4.5   |
| 127   | 1450.3  | 1444.6              | 5.8   | 1444.1  | 1440.2              | 3.8   |
| 128   | 1459.2  | 1445.2              | 14.0  | 1456.7  | 1442.3              | 14.4  |
| 129   | 1459.2  | 1445.2              | 14.0  | 1457.4  | 1442.3              | 15.1  |
| 130   | 1463.5  | 1445.5              | 18.0  | 1458.0  | 1442.4              | 15.6  |
| Freq. | IntraFF | OPBE/TZP<br>singlet | diff. | IntraFF | OPBE/TZP<br>quintet | diff. |

|     |        |               |      |        |               |      |
|-----|--------|---------------|------|--------|---------------|------|
| 131 | 1463.5 | 1445.6        | 17.9 | 1458.0 | 1442.4        | 15.6 |
| 132 | 1466.6 | 1455.8        | 10.8 | 1459.4 | 1445.4        | 14.0 |
| 133 | 1467.6 | 1456.8        | 10.8 | 1459.4 | 1445.8        | 13.7 |
| 134 | 1535.5 | <b>1514.8</b> | 20.7 | 1543.4 | <b>1523.7</b> | 19.6 |
| 135 | 1535.5 | <b>1514.8</b> | 20.8 | 1543.4 | <b>1523.7</b> | 19.7 |
| 136 | 1537.6 | <b>1516.5</b> | 21.1 | 1543.5 | <b>1524.0</b> | 19.4 |
| 137 | 1537.6 | <b>1516.5</b> | 21.1 | 1543.5 | <b>1524.0</b> | 19.4 |
| 138 | 1537.9 | <b>1524.7</b> | 13.3 | 1543.7 | <b>1529.9</b> | 13.8 |
| 139 | 1537.9 | <b>1525.1</b> | 12.8 | 1543.7 | <b>1530.5</b> | 13.2 |
| 140 | 2552.8 | 2552.4        | 0.4  | 2535.8 | 2535.4        | 0.4  |
| 141 | 2552.8 | 2553.2        | -0.4 | 2535.8 | 2536.1        | -0.3 |
| 142 | 3210.4 | 3210.3        | 0.1  | 3205.2 | 3205.0        | 0.1  |
| 143 | 3210.4 | 3210.3        | 0.1  | 3205.2 | 3205.0        | 0.1  |
| 144 | 3210.4 | 3210.4        | 0.0  | 3205.2 | 3205.1        | 0.1  |
| 145 | 3210.4 | 3210.4        | 0.0  | 3205.2 | 3205.2        | -0.1 |
| 146 | 3210.4 | 3210.5        | -0.1 | 3205.2 | 3205.2        | 0.0  |
| 147 | 3210.4 | 3210.6        | -0.2 | 3205.2 | 3205.5        | -0.3 |
| 148 | 3229.7 | 3229.7        | 0.1  | 3218.8 | 3218.5        | 0.2  |
| 149 | 3229.7 | 3229.7        | 0.1  | 3218.8 | 3218.5        | 0.2  |
| 150 | 3229.7 | 3229.7        | 0.1  | 3218.8 | 3218.7        | 0.1  |
| 151 | 3229.7 | 3229.7        | 0.1  | 3218.8 | 3218.8        | -0.1 |
| 152 | 3229.8 | 3229.8        | 0.0  | 3218.8 | 3218.8        | 0.0  |
| 153 | 3229.8 | 3230.2        | -0.4 | 3218.8 | 3219.4        | -0.6 |
| 154 | 3244.9 | 3244.4        | 0.5  | 3233.8 | 3233.7        | 0.1  |
| 155 | 3244.9 | 3244.6        | 0.3  | 3233.8 | 3233.7        | 0.1  |
| 156 | 3244.9 | 3244.6        | 0.3  | 3233.8 | 3233.7        | 0.1  |
| 157 | 3244.9 | 3245.2        | -0.3 | 3233.8 | 3233.9        | 0.0  |
| 158 | 3244.9 | 3245.2        | -0.2 | 3233.8 | 3233.9        | 0.0  |
| 159 | 3244.9 | 3245.6        | -0.7 | 3233.8 | 3234.0        | -0.2 |

a) indicated in **boldface** are those frequencies where the quintet value is higher than the singlet value

**Table S2.** Macroscopic density (kg/l) of dichloromethane and box-radius (a.u.) at different temperatures

| Temperature (K) | Macroscopic density (kg/l) | Box-radius (Bohr) |
|-----------------|----------------------------|-------------------|
| 200             | 1.4759                     | 29.4824           |
| 210             | 1.4618                     | 29.5735           |
| 220             | 1.4472                     | 29.6689           |
| 230             | 1.4321                     | 29.7687           |
| 240             | 1.4166                     | 29.8731           |
| 250             | 1.4005                     | 29.9823           |
| 260             | 1.3841                     | 30.0965           |
| 270             | 1.3671                     | 30.2158           |
| 280             | 1.3497                     | 30.3405           |
| 290             | 1.3318                     | 30.4709           |
| 300             | 1.3135                     | 30.6071           |
| 310             | 1.2947                     | 30.7495           |
| 320             | 1.2754                     | 30.8984           |
| 330             | 1.2557                     | 31.0540           |
| 340             | 1.2355                     | 31.2169           |
| 350             | 1.2148                     | 31.3872           |
| 360             | 1.1936                     | 31.5655           |
| 370             | 1.1720                     | 31.7523           |
| 380             | 1.1500                     | 31.9479           |
| 390             | 1.1274                     | 32.1529           |
| 400             | 1.1044                     | 32.3681           |
| 410             | 1.0810                     | 32.5939           |
| 420             | 1.0570                     | 32.8311           |
| 430             | 1.0326                     | 33.0805           |
| 440             | 1.0077                     | 33.3431           |
| 450             | 0.9824                     | 33.6197           |

Macroscopic densities from CRC Handbook:

| Temperature (°C) | Density (kg/l) |
|------------------|----------------|
| 0                | 1.362          |
| 10               | 1.344          |
| 20               | 1.326          |
| 30               | 1.307          |
| 40               | 1.289          |
| 50               | 1.269          |
| 60               | 1.250          |
| 70               | 1.229          |
| 80               | 1.208          |
| 90               | 1.187          |
| 100              | 1.165          |

Force field parameters for iron-compound in low and high state

Singlet

| bond  | i1  | i2  | k        | R        |           |
|-------|-----|-----|----------|----------|-----------|
| BOND  | Fe1 | N2  | 146.9601 | 1.959737 |           |
| BOND  | Fe1 | N4  | 146.9601 | 1.959737 |           |
| BOND  | Fe1 | N6  | 146.9601 | 1.959737 |           |
| BOND  | Fe1 | N18 | 146.9601 | 1.959737 |           |
| BOND  | Fe1 | N20 | 146.9601 | 1.959737 |           |
| BOND  | N19 | Fe1 | 146.9601 | 1.959737 |           |
| BOND  | N2  | N3  | 155.5122 | 1.346781 |           |
| BOND  | N4  | N5  | 155.5122 | 1.346781 |           |
| BOND  | N6  | N7  | 155.5122 | 1.346781 |           |
| BOND  | N18 | N23 | 155.5122 | 1.346781 |           |
| BOND  | N19 | N25 | 155.5122 | 1.346781 |           |
| BOND  | N20 | N22 | 155.5122 | 1.346781 |           |
| BOND  | N2  | C10 | 260.5812 | 1.339798 |           |
| BOND  | N4  | C13 | 260.5812 | 1.339798 |           |
| BOND  | N6  | C16 | 260.5812 | 1.339798 |           |
| BOND  | N18 | C24 | 260.5812 | 1.339798 |           |
| BOND  | N19 | C26 | 260.5812 | 1.339798 |           |
| BOND  | N20 | C27 | 260.5812 | 1.339798 |           |
| BOND  | N3  | C8  | 264.5643 | 1.348575 |           |
| BOND  | N5  | C11 | 264.5643 | 1.348575 |           |
| BOND  | N7  | C14 | 264.5643 | 1.348575 |           |
| BOND  | N22 | C28 | 264.5643 | 1.348575 |           |
| BOND  | N23 | C29 | 264.5643 | 1.348575 |           |
| BOND  | N25 | C31 | 264.5643 | 1.348575 |           |
| BOND  | N3  | B17 | 160.3521 | 1.534820 |           |
| BOND  | N5  | B17 | 160.3521 | 1.534820 |           |
| BOND  | N7  | B21 | 160.3521 | 1.534820 |           |
| BOND  | B17 | N22 | 160.3521 | 1.534820 |           |
| BOND  | B21 | N23 | 160.3521 | 1.534820 |           |
| BOND  | B21 | N25 | 160.3521 | 1.534820 |           |
| BOND  | C8  | C9  | 353.5446 | 1.385210 |           |
| BOND  | C11 | C12 | 353.5446 | 1.385210 |           |
| BOND  | C14 | C15 | 353.5446 | 1.385210 |           |
| BOND  | C28 | C33 | 353.5446 | 1.385210 |           |
| BOND  | C29 | C30 | 353.5446 | 1.385210 |           |
| BOND  | C31 | C32 | 353.5446 | 1.385210 |           |
| BOND  | C8  | H49 | 406.9132 | 1.083067 |           |
| BOND  | C11 | H48 | 406.9132 | 1.083067 |           |
| BOND  | C14 | H52 | 406.9132 | 1.083067 |           |
| BOND  | C28 | H50 | 406.9132 | 1.083067 |           |
| BOND  | C29 | H53 | 406.9132 | 1.083067 |           |
| BOND  | C31 | H51 | 406.9132 | 1.083067 |           |
| BOND  | C9  | C10 | 218.5871 | 1.399173 |           |
| BOND  | C12 | C13 | 218.5871 | 1.399173 |           |
| BOND  | C15 | C16 | 218.5871 | 1.399173 |           |
| BOND  | C24 | C30 | 218.5871 | 1.399173 |           |
| BOND  | C26 | C32 | 218.5871 | 1.399173 |           |
| BOND  | C27 | C33 | 218.5871 | 1.399173 |           |
| BOND  | C9  | H39 | 402.3165 | 1.083567 |           |
| BOND  | C12 | H41 | 402.3165 | 1.083567 |           |
| BOND  | C15 | H40 | 402.3165 | 1.083567 |           |
| BOND  | C30 | H37 | 402.3165 | 1.083567 |           |
| BOND  | C32 | H36 | 402.3165 | 1.083567 |           |
| BOND  | C33 | H38 | 402.3165 | 1.083567 |           |
| BOND  | C10 | H43 | 411.5010 | 1.081516 |           |
| BOND  | C13 | H47 | 411.5010 | 1.081516 |           |
| BOND  | C16 | H42 | 411.5010 | 1.081516 |           |
| BOND  | C24 | H45 | 411.5010 | 1.081516 |           |
| BOND  | C26 | H46 | 411.5010 | 1.081516 |           |
| BOND  | C27 | H44 | 411.5010 | 1.081516 |           |
| BOND  | B17 | H35 | 249.9358 | 1.202551 |           |
| BOND  | B21 | H34 | 249.9358 | 1.202551 |           |
| angle | i1  | i2  | i3       | k        | theta     |
| ANGLE | N18 | Fe1 | N6       | 203.8032 | 88.675256 |
| ANGLE | N19 | Fe1 | N18      | 203.8032 | 88.675256 |
| ANGLE | N19 | Fe1 | N6       | 203.8032 | 88.675256 |
| ANGLE | N20 | Fe1 | N2       | 203.8032 | 88.675256 |
| ANGLE | N20 | Fe1 | N4       | 203.8032 | 88.675256 |
| ANGLE | N4  | Fe1 | N2       | 203.8032 | 88.675256 |
| ANGLE | N18 | Fe1 | N4       | 208.4059 | 91.324744 |
| ANGLE | N19 | Fe1 | N2       | 208.4059 | 91.324744 |
| ANGLE | N19 | Fe1 | N20      | 208.4059 | 91.324744 |
| ANGLE | N20 | Fe1 | N18      | 208.4059 | 91.324744 |
| ANGLE | N6  | Fe1 | N2       | 208.4059 | 91.324744 |

Supplementary Material (ESI) for PCCP  
This journal is © the Owner Societies 2011

|       |     |     |     |          |            |
|-------|-----|-----|-----|----------|------------|
| ANGLE | N6  | Fe1 | N4  | 208.4059 | 91.324744  |
| ANGLE | C10 | C9  | C8  | 174.1487 | 104.640706 |
| ANGLE | C13 | C12 | C11 | 174.1487 | 104.640706 |
| ANGLE | C16 | C15 | C14 | 174.1487 | 104.640706 |
| ANGLE | C28 | C33 | C27 | 174.1487 | 104.640706 |
| ANGLE | C29 | C30 | C24 | 174.1487 | 104.640706 |
| ANGLE | C31 | C32 | C26 | 174.1487 | 104.640706 |
| ANGLE | C10 | N2  | N3  | 117.2426 | 106.892006 |
| ANGLE | C13 | N4  | N5  | 117.2426 | 106.892006 |
| ANGLE | C16 | N6  | N7  | 117.2426 | 106.892006 |
| ANGLE | C24 | N18 | N23 | 117.2426 | 106.892006 |
| ANGLE | C26 | N19 | N25 | 117.2426 | 106.892006 |
| ANGLE | C27 | N20 | N22 | 117.2426 | 106.892006 |
| ANGLE | C12 | C11 | N5  | 144.1767 | 108.059935 |
| ANGLE | C15 | C14 | N7  | 144.1767 | 108.059935 |
| ANGLE | C30 | C29 | N23 | 144.1767 | 108.059935 |
| ANGLE | C32 | C31 | N25 | 144.1767 | 108.059935 |
| ANGLE | C33 | C28 | N22 | 144.1767 | 108.059935 |
| ANGLE | C9  | C8  | N3  | 144.1767 | 108.059935 |
| ANGLE | H34 | B21 | N23 | 42.6076  | 111.452821 |
| ANGLE | H34 | B21 | N25 | 42.6076  | 111.452821 |
| ANGLE | H34 | B21 | N7  | 42.6076  | 111.452821 |
| ANGLE | H35 | B17 | N22 | 42.6076  | 111.452821 |
| ANGLE | H35 | B17 | N3  | 42.6076  | 111.452821 |
| ANGLE | H35 | B17 | N5  | 42.6076  | 111.452821 |
| ANGLE | N22 | B17 | N3  | 109.7677 | 107.418981 |
| ANGLE | N22 | B17 | N5  | 109.7677 | 107.418981 |
| ANGLE | N23 | B21 | N7  | 109.7677 | 107.418981 |
| ANGLE | N25 | B21 | N23 | 109.7677 | 107.418981 |
| ANGLE | N25 | B21 | N7  | 109.7677 | 107.418981 |
| ANGLE | N5  | B17 | N3  | 109.7677 | 107.418981 |
| ANGLE | C11 | N5  | N4  | 75.9716  | 110.285087 |
| ANGLE | C14 | N7  | N6  | 75.9716  | 110.285087 |
| ANGLE | C28 | N22 | N20 | 75.9716  | 110.285087 |
| ANGLE | C29 | N23 | N18 | 75.9716  | 110.285087 |
| ANGLE | C31 | N25 | N19 | 75.9716  | 110.285087 |
| ANGLE | C8  | N3  | N2  | 75.9716  | 110.285087 |
| ANGLE | C12 | C13 | N4  | 99.4151  | 110.122266 |
| ANGLE | C15 | C16 | N6  | 99.4151  | 110.122266 |
| ANGLE | C30 | C24 | N18 | 99.4151  | 110.122266 |
| ANGLE | C32 | C26 | N19 | 99.4151  | 110.122266 |
| ANGLE | C33 | C27 | N20 | 99.4151  | 110.122266 |
| ANGLE | C9  | C10 | N2  | 99.4151  | 110.122266 |
| ANGLE | N22 | N20 | Fe1 | 126.0035 | 119.671539 |
| ANGLE | N23 | N18 | Fe1 | 126.0035 | 119.671539 |
| ANGLE | N25 | N19 | Fe1 | 126.0035 | 119.671539 |
| ANGLE | N3  | N2  | Fe1 | 126.0035 | 119.671539 |
| ANGLE | N5  | N4  | Fe1 | 126.0035 | 119.671539 |
| ANGLE | N7  | N6  | Fe1 | 126.0035 | 119.671539 |
| ANGLE | H42 | C16 | N6  | 23.5399  | 120.087054 |
| ANGLE | H43 | C10 | N2  | 23.5399  | 120.087054 |
| ANGLE | H44 | C27 | N20 | 23.5399  | 120.087054 |
| ANGLE | H45 | C24 | N18 | 23.5399  | 120.087054 |
| ANGLE | H46 | C26 | N19 | 23.5399  | 120.087054 |
| ANGLE | H47 | C13 | N4  | 23.5399  | 120.087054 |
| ANGLE | H48 | C11 | N5  | 35.1998  | 120.555715 |
| ANGLE | H49 | C8  | N3  | 35.1998  | 120.555715 |
| ANGLE | H50 | C28 | N22 | 35.1998  | 120.555715 |
| ANGLE | H51 | C31 | N25 | 35.1998  | 120.555715 |
| ANGLE | H52 | C14 | N7  | 35.1998  | 120.555715 |
| ANGLE | H53 | C29 | N23 | 35.1998  | 120.555715 |
| ANGLE | B17 | N3  | N2  | 92.1472  | 117.977134 |
| ANGLE | B17 | N5  | N4  | 92.1472  | 117.977134 |
| ANGLE | N20 | N22 | B17 | 92.1472  | 117.977134 |
| ANGLE | B21 | N23 | N18 | 92.1472  | 117.977134 |
| ANGLE | B21 | N25 | N19 | 92.1472  | 117.977134 |
| ANGLE | B21 | N7  | N6  | 92.1472  | 117.977134 |
| ANGLE | H36 | C32 | C31 | 33.4945  | 127.587229 |
| ANGLE | H37 | C30 | C29 | 33.4945  | 127.587229 |
| ANGLE | H38 | C33 | C28 | 33.4945  | 127.587229 |
| ANGLE | H39 | C9  | C8  | 33.4945  | 127.587229 |
| ANGLE | H40 | C15 | C14 | 33.4945  | 127.587229 |
| ANGLE | H41 | C12 | C11 | 33.4945  | 127.587229 |
| ANGLE | H36 | C32 | C26 | 33.8889  | 127.772066 |
| ANGLE | H37 | C30 | C24 | 33.8889  | 127.772066 |
| ANGLE | H38 | C33 | C27 | 33.8889  | 127.772066 |
| ANGLE | H39 | C9  | C10 | 33.8889  | 127.772066 |
| ANGLE | H40 | C15 | C16 | 33.8889  | 127.772066 |
| ANGLE | H41 | C12 | C13 | 33.8889  | 127.772066 |
| ANGLE | B17 | N3  | C8  | 99.0962  | 131.737778 |

Supplementary Material (ESI) for PCCP  
This journal is © the Owner Societies 2011

|          |     |     |     |     |   |          |     |            |     |
|----------|-----|-----|-----|-----|---|----------|-----|------------|-----|
| ANGLE    | B17 | N5  | C11 |     |   | 99.0962  |     | 131.737778 |     |
| ANGLE    | B21 | N7  | C14 |     |   | 99.0962  |     | 131.737778 |     |
| ANGLE    | C28 | N22 | B17 |     |   | 99.0962  |     | 131.737778 |     |
| ANGLE    | C29 | N23 | B21 |     |   | 99.0962  |     | 131.737778 |     |
| ANGLE    | C31 | N25 | B21 |     |   | 99.0962  |     | 131.737778 |     |
| ANGLE    | H42 | C16 | C15 |     |   | 37.2325  |     | 129.790680 |     |
| ANGLE    | H43 | C10 | C9  |     |   | 37.2325  |     | 129.790680 |     |
| ANGLE    | H44 | C27 | C33 |     |   | 37.2325  |     | 129.790680 |     |
| ANGLE    | H45 | C24 | C30 |     |   | 37.2325  |     | 129.790680 |     |
| ANGLE    | H46 | C26 | C32 |     |   | 37.2325  |     | 129.790680 |     |
| ANGLE    | H47 | C13 | C12 |     |   | 37.2325  |     | 129.790680 |     |
| ANGLE    | H48 | C11 | C12 |     |   | 32.5688  |     | 131.384349 |     |
| ANGLE    | H49 | C8  | C9  |     |   | 32.5688  |     | 131.384349 |     |
| ANGLE    | H50 | C28 | C33 |     |   | 32.5688  |     | 131.384349 |     |
| ANGLE    | H51 | C31 | C32 |     |   | 32.5688  |     | 131.384349 |     |
| ANGLE    | H52 | C14 | C15 |     |   | 32.5688  |     | 131.384349 |     |
| ANGLE    | H53 | C29 | C30 |     |   | 32.5688  |     | 131.384349 |     |
| ANGLE    | C10 | N2  | Fe1 |     |   | 124.3723 |     | 133.436455 |     |
| ANGLE    | C13 | N4  | Fe1 |     |   | 124.3723 |     | 133.436455 |     |
| ANGLE    | C16 | N6  | Fe1 |     |   | 124.3723 |     | 133.436455 |     |
| ANGLE    | C24 | N18 | Fe1 |     |   | 124.3723 |     | 133.436455 |     |
| ANGLE    | C26 | N19 | Fe1 |     |   | 124.3723 |     | 133.436455 |     |
| ANGLE    | C27 | N20 | Fe1 |     |   | 124.3723 |     | 133.436455 |     |
| dihedral | i1  | i2  | i3  | i4  |   |          | k   | divf       | phi |
| DIHEDRAL | C10 | C9  | C8  | N3  | 1 | 12.0427  | 1.0 | 360.000000 |     |
| DIHEDRAL | C13 | C12 | C11 | N5  | 1 | 12.0427  | 1.0 | 360.000000 |     |
| DIHEDRAL | C16 | C15 | C14 | N7  | 1 | 12.0427  | 1.0 | 360.000000 |     |
| DIHEDRAL | C26 | C32 | C31 | N25 | 1 | 12.0427  | 1.0 | 360.000000 |     |
| DIHEDRAL | C24 | C30 | C29 | N23 | 1 | 12.0427  | 1.0 | 360.000000 |     |
| DIHEDRAL | C27 | C33 | C28 | N22 | 1 | 12.0427  | 1.0 | 360.000000 |     |
| DIHEDRAL | C11 | C12 | C13 | N4  | 1 | 12.0738  | 1.0 | 0.000000   |     |
| DIHEDRAL | C8  | C9  | C10 | N2  | 1 | 12.0738  | 1.0 | 0.000000   |     |
| DIHEDRAL | C14 | C15 | C16 | N6  | 1 | 12.0738  | 1.0 | 0.000000   |     |
| DIHEDRAL | C28 | C33 | C27 | N20 | 1 | 12.0738  | 1.0 | 0.000000   |     |
| DIHEDRAL | C29 | C30 | C24 | N18 | 1 | 12.0738  | 1.0 | 0.000000   |     |
| DIHEDRAL | C31 | C32 | C26 | N19 | 1 | 12.0738  | 1.0 | 0.000000   |     |
| DIHEDRAL | C8  | N3  | N2  | C10 | 1 | 13.2685  | 1.0 | 360.000000 |     |
| DIHEDRAL | C11 | N5  | N4  | C13 | 1 | 13.2685  | 1.0 | 360.000000 |     |
| DIHEDRAL | C14 | N7  | N6  | C16 | 1 | 13.2685  | 1.0 | 360.000000 |     |
| DIHEDRAL | C28 | N22 | N20 | C27 | 1 | 13.2685  | 1.0 | 360.000000 |     |
| DIHEDRAL | C29 | N23 | N18 | C24 | 1 | 13.2685  | 1.0 | 360.000000 |     |
| DIHEDRAL | C31 | N25 | N19 | C26 | 1 | 13.2685  | 1.0 | 360.000000 |     |
| DIHEDRAL | C9  | C8  | N3  | N2  | 1 | 11.7401  | 1.0 | 0.000000   |     |
| DIHEDRAL | C12 | C11 | N5  | N4  | 1 | 11.7401  | 1.0 | 0.000000   |     |
| DIHEDRAL | C15 | C14 | N7  | N6  | 1 | 11.7401  | 1.0 | 0.000000   |     |
| DIHEDRAL | C30 | C29 | N23 | N18 | 1 | 11.7401  | 1.0 | 0.000000   |     |
| DIHEDRAL | C32 | C31 | N25 | N19 | 1 | 11.7401  | 1.0 | 0.000000   |     |
| DIHEDRAL | C33 | C28 | N22 | N20 | 1 | 11.7401  | 1.0 | 0.000000   |     |
| DIHEDRAL | C9  | C10 | N2  | N3  | 1 | 13.1558  | 1.0 | 0.000000   |     |
| DIHEDRAL | C12 | C13 | N4  | N5  | 1 | 13.1558  | 1.0 | 0.000000   |     |
| DIHEDRAL | C15 | C16 | N6  | N7  | 1 | 13.1558  | 1.0 | 0.000000   |     |
| DIHEDRAL | C30 | C24 | N18 | N23 | 1 | 13.1558  | 1.0 | 0.000000   |     |
| DIHEDRAL | C32 | C26 | N19 | N25 | 1 | 13.1558  | 1.0 | 0.000000   |     |
| DIHEDRAL | C33 | C27 | N20 | N22 | 1 | 13.1558  | 1.0 | 0.000000   |     |
| DIHEDRAL | B17 | N3  | N2  | Fe1 | 1 | 11.0914  | 1.0 | 0.000000   |     |
| DIHEDRAL | B17 | N22 | N20 | Fe1 | 1 | 11.0914  | 1.0 | 0.000000   |     |
| DIHEDRAL | B17 | N5  | N4  | Fe1 | 1 | 11.0914  | 1.0 | 0.000000   |     |
| DIHEDRAL | B21 | N23 | N18 | Fe1 | 1 | 11.0914  | 1.0 | 0.000000   |     |
| DIHEDRAL | B21 | N25 | N19 | Fe1 | 1 | 11.0914  | 1.0 | 0.000000   |     |
| DIHEDRAL | B21 | N7  | N6  | Fe1 | 1 | 11.0914  | 1.0 | 0.000000   |     |
| DIHEDRAL | C28 | N22 | B17 | H35 | 1 | 3.4239   | 1.0 | 0.000000   |     |
| DIHEDRAL | C29 | N23 | B21 | H34 | 1 | 3.4239   | 1.0 | 0.000000   |     |
| DIHEDRAL | C31 | N25 | B21 | H34 | 1 | 3.4239   | 1.0 | 0.000000   |     |
| DIHEDRAL | H34 | B21 | N7  | C14 | 1 | 3.4239   | 1.0 | 0.000000   |     |
| DIHEDRAL | H35 | B17 | N3  | C8  | 1 | 3.4239   | 1.0 | 0.000000   |     |
| DIHEDRAL | H35 | B17 | N5  | C11 | 1 | 3.4239   | 1.0 | 0.000000   |     |
| DIHEDRAL | H36 | C32 | C26 | H46 | 1 | 1.8548   | 1.0 | 360.000000 |     |
| DIHEDRAL | H37 | C30 | C24 | H45 | 1 | 1.8548   | 1.0 | 360.000000 |     |
| DIHEDRAL | H38 | C33 | C27 | H44 | 1 | 1.8548   | 1.0 | 360.000000 |     |
| DIHEDRAL | H42 | C16 | C15 | H40 | 1 | 1.8548   | 1.0 | 360.000000 |     |
| DIHEDRAL | H43 | C10 | C9  | H39 | 1 | 1.8548   | 1.0 | 360.000000 |     |
| DIHEDRAL | H47 | C13 | C12 | H41 | 1 | 1.8548   | 1.0 | 360.000000 |     |
| DIHEDRAL | H36 | C32 | C31 | H51 | 1 | 1.6613   | 1.0 | 0.000000   |     |
| DIHEDRAL | H37 | C30 | C29 | H53 | 1 | 1.6613   | 1.0 | 0.000000   |     |
| DIHEDRAL | H38 | C33 | C28 | H50 | 1 | 1.6613   | 1.0 | 0.000000   |     |
| DIHEDRAL | H39 | C9  | C8  | H49 | 1 | 1.6613   | 1.0 | 0.000000   |     |
| DIHEDRAL | H40 | C15 | C14 | H52 | 1 | 1.6613   | 1.0 | 0.000000   |     |
| DIHEDRAL | H41 | C12 | C11 | H48 | 1 | 1.6613   | 1.0 | 0.000000   |     |
| DIHEDRAL | H42 | C16 | N6  | Fe1 | 1 | 3.2473   | 1.0 | 0.000000   |     |
| DIHEDRAL | H43 | C10 | N2  | Fe1 | 1 | 3.2473   | 1.0 | 0.000000   |     |



Supplementary Material (ESI) for PCCP  
 This journal is © the Owner Societies 2011

|          |     |     |     |     |   |         |     |            |
|----------|-----|-----|-----|-----|---|---------|-----|------------|
| DIHEDRAL | H44 | C27 | N20 | Fe1 | 1 | 3.2473  | 1.0 | 0.000000   |
| DIHEDRAL | H45 | C24 | N18 | Fe1 | 1 | 3.2473  | 1.0 | 0.000000   |
| DIHEDRAL | H46 | C26 | N19 | Fe1 | 1 | 3.2473  | 1.0 | 0.000000   |
| DIHEDRAL | H47 | C13 | N4  | Fe1 | 1 | 3.2473  | 1.0 | 0.000000   |
| DIHEDRAL | H48 | C11 | N5  | B17 | 1 | 2.8966  | 1.0 | 0.000000   |
| DIHEDRAL | H49 | C8  | N3  | B17 | 1 | 2.8966  | 1.0 | 0.000000   |
| DIHEDRAL | H50 | C28 | N22 | B17 | 1 | 2.8966  | 1.0 | 0.000000   |
| DIHEDRAL | H51 | C31 | N25 | B21 | 1 | 2.8966  | 1.0 | 0.000000   |
| DIHEDRAL | H52 | C14 | N7  | B21 | 1 | 2.8966  | 1.0 | 0.000000   |
| DIHEDRAL | H53 | C29 | N23 | B21 | 1 | 2.8966  | 1.0 | 0.000000   |
| DIHEDRAL | C13 | N4  | Fe1 | N6  | 1 | 4.6634  | 1.0 | 44.352598  |
| DIHEDRAL | C16 | N6  | Fe1 | N4  | 1 | 4.6634  | 1.0 | 44.352598  |
| DIHEDRAL | N19 | Fe1 | N2  | C10 | 1 | 4.6634  | 1.0 | 44.352598  |
| DIHEDRAL | C24 | N18 | Fe1 | N20 | 1 | 4.6634  | 1.0 | 44.352598  |
| DIHEDRAL | C26 | N19 | Fe1 | N2  | 1 | 4.6634  | 1.0 | 44.352598  |
| DIHEDRAL | C27 | N20 | Fe1 | N18 | 1 | 4.6634  | 1.0 | 44.352598  |
| DIHEDRAL | N19 | Fe1 | N6  | N7  | 1 | 8.0036  | 1.0 | 44.352598  |
| DIHEDRAL | N22 | N20 | Fe1 | N2  | 1 | 8.0036  | 1.0 | 44.352598  |
| DIHEDRAL | N23 | N18 | Fe1 | N6  | 1 | 8.0036  | 1.0 | 44.352598  |
| DIHEDRAL | N25 | N19 | Fe1 | N18 | 1 | 8.0036  | 1.0 | 44.352598  |
| DIHEDRAL | N3  | N2  | Fe1 | N4  | 1 | 8.0036  | 1.0 | 44.352598  |
| DIHEDRAL | N5  | N4  | Fe1 | N20 | 1 | 8.0036  | 1.0 | 44.352598  |
| DIHEDRAL | N19 | N25 | B21 | N7  | 1 | 12.5208 | 1.0 | 57.646905  |
| DIHEDRAL | N20 | N22 | B17 | N5  | 1 | 12.5208 | 1.0 | 57.646905  |
| DIHEDRAL | N22 | B17 | N3  | N2  | 1 | 12.5208 | 1.0 | 57.646905  |
| DIHEDRAL | N23 | B21 | N7  | N6  | 1 | 12.5208 | 1.0 | 57.646905  |
| DIHEDRAL | N25 | B21 | N23 | N18 | 1 | 12.5208 | 1.0 | 57.646905  |
| DIHEDRAL | N4  | N5  | B17 | N3  | 1 | 12.5208 | 1.0 | 57.646905  |
| DIHEDRAL | N22 | B17 | N5  | C11 | 1 | 9.8988  | 1.0 | 122.353095 |
| DIHEDRAL | N25 | B21 | N7  | C14 | 1 | 9.8988  | 1.0 | 122.353095 |
| DIHEDRAL | C28 | N22 | B17 | N3  | 1 | 9.8988  | 1.0 | 122.353095 |
| DIHEDRAL | C29 | N23 | B21 | N7  | 1 | 9.8988  | 1.0 | 122.353095 |
| DIHEDRAL | C31 | N25 | B21 | N23 | 1 | 9.8988  | 1.0 | 122.353095 |
| DIHEDRAL | N5  | B17 | N3  | C8  | 1 | 9.8988  | 1.0 | 122.353095 |
| DIHEDRAL | C10 | N2  | Fe1 | N20 | 1 | 5.0085  | 1.0 | 135.647402 |
| DIHEDRAL | C13 | N4  | Fe1 | N2  | 1 | 5.0085  | 1.0 | 135.647402 |
| DIHEDRAL | C16 | N6  | Fe1 | N18 | 1 | 5.0085  | 1.0 | 135.647402 |
| DIHEDRAL | N19 | Fe1 | N18 | C24 | 1 | 5.0085  | 1.0 | 135.647402 |
| DIHEDRAL | C26 | N19 | Fe1 | N6  | 1 | 5.0085  | 1.0 | 135.647402 |
| DIHEDRAL | C27 | N20 | Fe1 | N4  | 1 | 5.0085  | 1.0 | 135.647402 |
| DIHEDRAL | N22 | N20 | Fe1 | N19 | 1 | 8.4273  | 1.0 | 135.647402 |
| DIHEDRAL | N23 | N18 | Fe1 | N4  | 1 | 8.4273  | 1.0 | 135.647402 |
| DIHEDRAL | N25 | N19 | Fe1 | N20 | 1 | 8.4273  | 1.0 | 135.647402 |
| DIHEDRAL | N3  | N2  | Fe1 | N6  | 1 | 8.4273  | 1.0 | 135.647402 |
| DIHEDRAL | N5  | N4  | Fe1 | N18 | 1 | 8.4273  | 1.0 | 135.647402 |
| DIHEDRAL | N7  | N6  | Fe1 | N2  | 1 | 8.4273  | 1.0 | 135.647402 |
| DIHEDRAL | C10 | C9  | C8  | H49 | 1 | 3.1773  | 1.0 | 180.000000 |
| DIHEDRAL | H51 | C31 | C32 | C26 | 1 | 3.1773  | 1.0 | 180.000000 |
| DIHEDRAL | C13 | C12 | C11 | H48 | 1 | 3.1773  | 1.0 | 180.000000 |
| DIHEDRAL | C16 | C15 | C14 | H52 | 1 | 3.1773  | 1.0 | 180.000000 |
| DIHEDRAL | H50 | C28 | C33 | C27 | 1 | 3.1773  | 1.0 | 180.000000 |
| DIHEDRAL | H53 | C29 | C30 | C24 | 1 | 3.1773  | 1.0 | 180.000000 |
| DIHEDRAL | C11 | N5  | N4  | Fe1 | 1 | 15.1425 | 1.0 | 180.000000 |
| DIHEDRAL | C14 | N7  | N6  | Fe1 | 1 | 15.1425 | 1.0 | 180.000000 |
| DIHEDRAL | C28 | N22 | N20 | Fe1 | 1 | 15.1425 | 1.0 | 180.000000 |
| DIHEDRAL | C29 | N23 | N18 | Fe1 | 1 | 15.1425 | 1.0 | 180.000000 |
| DIHEDRAL | C31 | N25 | N19 | Fe1 | 1 | 15.1425 | 1.0 | 180.000000 |
| DIHEDRAL | C8  | N3  | N2  | Fe1 | 1 | 15.1425 | 1.0 | 180.000000 |
| DIHEDRAL | C12 | C11 | N5  | B17 | 1 | 13.6363 | 1.0 | 180.000000 |
| DIHEDRAL | C9  | C8  | N3  | B17 | 1 | 13.6363 | 1.0 | 180.000000 |
| DIHEDRAL | C15 | C14 | N7  | B21 | 1 | 13.6363 | 1.0 | 180.000000 |
| DIHEDRAL | C30 | C29 | N23 | B21 | 1 | 13.6363 | 1.0 | 180.000000 |
| DIHEDRAL | C32 | C31 | N25 | B21 | 1 | 13.6363 | 1.0 | 180.000000 |
| DIHEDRAL | C33 | C28 | N22 | B17 | 1 | 13.6363 | 1.0 | 180.000000 |
| DIHEDRAL | C12 | C13 | N4  | Fe1 | 1 | 11.9261 | 1.0 | 180.000000 |
| DIHEDRAL | C15 | C16 | N6  | Fe1 | 1 | 11.9261 | 1.0 | 180.000000 |
| DIHEDRAL | C30 | C24 | N18 | Fe1 | 1 | 11.9261 | 1.0 | 180.000000 |
| DIHEDRAL | C32 | C26 | N19 | Fe1 | 1 | 11.9261 | 1.0 | 180.000000 |
| DIHEDRAL | C33 | C27 | N20 | Fe1 | 1 | 11.9261 | 1.0 | 180.000000 |
| DIHEDRAL | C9  | C10 | N2  | Fe1 | 1 | 11.9261 | 1.0 | 180.000000 |
| DIHEDRAL | B17 | N3  | N2  | C10 | 1 | 17.8712 | 1.0 | 180.000000 |
| DIHEDRAL | B17 | N5  | N4  | C13 | 1 | 17.8712 | 1.0 | 180.000000 |
| DIHEDRAL | B21 | N23 | N18 | C24 | 1 | 17.8712 | 1.0 | 180.000000 |
| DIHEDRAL | B21 | N25 | N19 | C26 | 1 | 17.8712 | 1.0 | 180.000000 |
| DIHEDRAL | B21 | N7  | N6  | C16 | 1 | 17.8712 | 1.0 | 180.000000 |
| DIHEDRAL | C27 | N20 | N22 | B17 | 1 | 17.8712 | 1.0 | 180.000000 |
| DIHEDRAL | N20 | N22 | B17 | H35 | 1 | 5.8716  | 1.0 | 180.000000 |
| DIHEDRAL | H34 | B21 | N23 | N18 | 1 | 5.8716  | 1.0 | 180.000000 |
| DIHEDRAL | H34 | B21 | N25 | N19 | 1 | 5.8716  | 1.0 | 180.000000 |
| DIHEDRAL | H34 | B21 | N7  | N6  | 1 | 5.8716  | 1.0 | 180.000000 |

Supplementary Material (ESI) for PCCP  
 This journal is © the Owner Societies 2011

|          |     |     |     |     |   |         |     |            |
|----------|-----|-----|-----|-----|---|---------|-----|------------|
| DIHEDRAL | H35 | B17 | N3  | N2  | 1 | 5.8716  | 1.0 | 180.000000 |
| DIHEDRAL | H35 | B17 | N5  | N4  | 1 | 5.8716  | 1.0 | 180.000000 |
| DIHEDRAL | C28 | C33 | C27 | H44 | 1 | 3.7068  | 1.0 | 180.000000 |
| DIHEDRAL | C29 | C30 | C24 | H45 | 1 | 3.7068  | 1.0 | 180.000000 |
| DIHEDRAL | C31 | C32 | C26 | H46 | 1 | 3.7068  | 1.0 | 180.000000 |
| DIHEDRAL | H42 | C16 | C15 | C14 | 1 | 3.7068  | 1.0 | 180.000000 |
| DIHEDRAL | H43 | C10 | C9  | C8  | 1 | 3.7068  | 1.0 | 180.000000 |
| DIHEDRAL | H47 | C13 | C12 | C11 | 1 | 3.7068  | 1.0 | 180.000000 |
| DIHEDRAL | H36 | C32 | C26 | N19 | 1 | 3.4020  | 1.0 | 180.000000 |
| DIHEDRAL | H37 | C30 | C24 | N18 | 1 | 3.4020  | 1.0 | 180.000000 |
| DIHEDRAL | H38 | C33 | C27 | N20 | 1 | 3.4020  | 1.0 | 180.000000 |
| DIHEDRAL | H39 | C9  | C10 | N2  | 1 | 3.4020  | 1.0 | 180.000000 |
| DIHEDRAL | H40 | C15 | C16 | N6  | 1 | 3.4020  | 1.0 | 180.000000 |
| DIHEDRAL | H41 | C12 | C13 | N4  | 1 | 3.4020  | 1.0 | 180.000000 |
| DIHEDRAL | H36 | C32 | C31 | N25 | 1 | 3.4365  | 1.0 | 180.000000 |
| DIHEDRAL | H37 | C30 | C29 | N23 | 1 | 3.4365  | 1.0 | 180.000000 |
| DIHEDRAL | H38 | C33 | C28 | N22 | 1 | 3.4365  | 1.0 | 180.000000 |
| DIHEDRAL | H39 | C9  | C8  | N3  | 1 | 3.4365  | 1.0 | 180.000000 |
| DIHEDRAL | H40 | C15 | C14 | N7  | 1 | 3.4365  | 1.0 | 180.000000 |
| DIHEDRAL | H41 | C12 | C11 | N5  | 1 | 3.4365  | 1.0 | 180.000000 |
| DIHEDRAL | H42 | C16 | N6  | N7  | 1 | 4.3084  | 1.0 | 180.000000 |
| DIHEDRAL | H45 | C24 | N18 | N23 | 1 | 4.3084  | 1.0 | 180.000000 |
| DIHEDRAL | H48 | C11 | N5  | N4  | 1 | 4.3084  | 1.0 | 180.000000 |
| DIHEDRAL | H49 | C8  | N3  | N2  | 1 | 4.3084  | 1.0 | 180.000000 |
| DIHEDRAL | H50 | C28 | N22 | N20 | 1 | 4.3084  | 1.0 | 180.000000 |
| DIHEDRAL | H51 | C31 | N25 | N19 | 1 | 4.3084  | 1.0 | 180.000000 |
| DIHEDRAL | H43 | C10 | N2  | N3  | 1 | 4.5102  | 1.0 | 180.000000 |
| DIHEDRAL | H44 | C27 | N20 | N22 | 1 | 4.5102  | 1.0 | 180.000000 |
| DIHEDRAL | H46 | C26 | N19 | N25 | 1 | 4.5102  | 1.0 | 180.000000 |
| DIHEDRAL | H47 | C13 | N4  | N5  | 1 | 4.5102  | 1.0 | 180.000000 |
| DIHEDRAL | H52 | C14 | N7  | N6  | 1 | 4.5102  | 1.0 | 180.000000 |
| DIHEDRAL | H53 | C29 | N23 | N18 | 1 | 4.5102  | 1.0 | 180.000000 |
| DIHEDRAL | C10 | N2  | Fe1 | N4  | 1 | 5.0085  | 1.0 | 224.352598 |
| DIHEDRAL | C13 | N4  | Fe1 | N20 | 1 | 5.0085  | 1.0 | 224.352598 |
| DIHEDRAL | N19 | Fe1 | N6  | C16 | 1 | 5.0085  | 1.0 | 224.352598 |
| DIHEDRAL | C24 | N18 | Fe1 | N6  | 1 | 5.0085  | 1.0 | 224.352598 |
| DIHEDRAL | C26 | N19 | Fe1 | N18 | 1 | 5.0085  | 1.0 | 224.352598 |
| DIHEDRAL | C27 | N20 | Fe1 | N2  | 1 | 5.0085  | 1.0 | 224.352598 |
| DIHEDRAL | N19 | Fe1 | N2  | N3  | 1 | 8.4276  | 1.0 | 224.352598 |
| DIHEDRAL | N22 | N20 | Fe1 | N18 | 1 | 8.4276  | 1.0 | 224.352598 |
| DIHEDRAL | N23 | N18 | Fe1 | N20 | 1 | 8.4276  | 1.0 | 224.352598 |
| DIHEDRAL | N25 | N19 | Fe1 | N2  | 1 | 8.4276  | 1.0 | 224.352598 |
| DIHEDRAL | N5  | N4  | Fe1 | N6  | 1 | 8.4276  | 1.0 | 224.352598 |
| DIHEDRAL | N7  | N6  | Fe1 | N4  | 1 | 8.4276  | 1.0 | 224.352598 |
| DIHEDRAL | C11 | N5  | B17 | N3  | 1 | 9.8954  | 1.0 | 237.646905 |
| DIHEDRAL | N22 | B17 | N3  | C8  | 1 | 9.8954  | 1.0 | 237.646905 |
| DIHEDRAL | N23 | B21 | N7  | C14 | 1 | 9.8954  | 1.0 | 237.646905 |
| DIHEDRAL | C28 | N22 | B17 | N5  | 1 | 9.8954  | 1.0 | 237.646905 |
| DIHEDRAL | C29 | N23 | B21 | N25 | 1 | 9.8954  | 1.0 | 237.646905 |
| DIHEDRAL | C31 | N25 | B21 | N7  | 1 | 9.8954  | 1.0 | 237.646905 |
| DIHEDRAL | N18 | N23 | B21 | N7  | 1 | 12.5207 | 1.0 | 302.353095 |
| DIHEDRAL | N20 | N22 | B17 | N3  | 1 | 12.5207 | 1.0 | 302.353095 |
| DIHEDRAL | N22 | B17 | N5  | N4  | 1 | 12.5207 | 1.0 | 302.353095 |
| DIHEDRAL | N23 | B21 | N25 | N19 | 1 | 12.5207 | 1.0 | 302.353095 |
| DIHEDRAL | N25 | B21 | N7  | N6  | 1 | 12.5207 | 1.0 | 302.353095 |
| DIHEDRAL | N5  | B17 | N3  | N2  | 1 | 12.5207 | 1.0 | 302.353095 |
| DIHEDRAL | C10 | N2  | Fe1 | N6  | 1 | 4.6632  | 1.0 | 315.647402 |
| DIHEDRAL | C13 | N4  | Fe1 | N18 | 1 | 4.6632  | 1.0 | 315.647402 |
| DIHEDRAL | C16 | N6  | Fe1 | N2  | 1 | 4.6632  | 1.0 | 315.647402 |
| DIHEDRAL | C24 | N18 | Fe1 | N4  | 1 | 4.6632  | 1.0 | 315.647402 |
| DIHEDRAL | C26 | N19 | Fe1 | N20 | 1 | 4.6632  | 1.0 | 315.647402 |
| DIHEDRAL | C27 | N20 | Fe1 | N19 | 1 | 4.6632  | 1.0 | 315.647402 |
| DIHEDRAL | N19 | Fe1 | N18 | N23 | 1 | 8.0041  | 1.0 | 315.647402 |
| DIHEDRAL | N22 | N20 | Fe1 | N4  | 1 | 8.0041  | 1.0 | 315.647402 |
| DIHEDRAL | N25 | N19 | Fe1 | N6  | 1 | 8.0041  | 1.0 | 315.647402 |
| DIHEDRAL | N5  | N4  | Fe1 | N2  | 1 | 8.0041  | 1.0 | 315.647402 |
| DIHEDRAL | N7  | N6  | Fe1 | N18 | 1 | 8.0041  | 1.0 | 315.647402 |
| DIHEDRAL | N3  | N2  | Fe1 | N20 | 1 | 8.0041  | 1.0 | 315.647402 |
| improper | i1  | i2  | i3  | i4  |   |         |     | k divf phi |
| IMPROPER | C10 | Fe1 | N2  | N3  | 1 | 7.5297  | 2.0 | 180.000000 |
| IMPROPER | C13 | Fe1 | N4  | N5  | 1 | 7.5297  | 2.0 | 180.000000 |
| IMPROPER | C16 | Fe1 | N6  | N7  | 1 | 7.5297  | 2.0 | 180.000000 |
| IMPROPER | C24 | Fe1 | N18 | N23 | 1 | 7.5297  | 2.0 | 180.000000 |
| IMPROPER | C26 | Fe1 | N19 | N25 | 1 | 7.5297  | 2.0 | 180.000000 |
| IMPROPER | C27 | Fe1 | N20 | N22 | 1 | 7.5297  | 2.0 | 180.000000 |
| IMPROPER | B17 | N2  | N3  | C8  | 1 | 10.2565 | 2.0 | 180.000000 |
| IMPROPER | B17 | N4  | N5  | C11 | 1 | 10.2565 | 2.0 | 180.000000 |
| IMPROPER | B17 | N20 | N22 | C28 | 1 | 10.2565 | 2.0 | 180.000000 |
| IMPROPER | B21 | N6  | N7  | C14 | 1 | 10.2565 | 2.0 | 180.000000 |
| IMPROPER | B21 | N18 | N23 | C29 | 1 | 10.2565 | 2.0 | 180.000000 |

Supplementary Material (ESI) for PCCP  
This journal is © the Owner Societies 2011

|          |     |     |     |     |   |         |     |            |
|----------|-----|-----|-----|-----|---|---------|-----|------------|
| IMPROPER | B21 | N19 | N25 | C31 | 1 | 10.2565 | 2.0 | 180.000000 |
| IMPROPER | H49 | C9  | C8  | N3  | 1 | 2.8950  | 2.0 | 180.000000 |
| IMPROPER | H48 | C12 | C11 | N5  | 1 | 2.8950  | 2.0 | 180.000000 |
| IMPROPER | H52 | C15 | C14 | N7  | 1 | 2.8950  | 2.0 | 180.000000 |
| IMPROPER | H50 | C33 | C28 | N22 | 1 | 2.8950  | 2.0 | 180.000000 |
| IMPROPER | H53 | C30 | C29 | N23 | 1 | 2.8950  | 2.0 | 180.000000 |
| IMPROPER | H51 | C32 | C31 | N25 | 1 | 2.8950  | 2.0 | 180.000000 |
| IMPROPER | H39 | C10 | C9  | C8  | 1 | 3.3400  | 2.0 | 180.000000 |
| IMPROPER | H41 | C13 | C12 | C11 | 1 | 3.3400  | 2.0 | 180.000000 |
| IMPROPER | H40 | C16 | C15 | C14 | 1 | 3.3400  | 2.0 | 180.000000 |
| IMPROPER | H37 | C24 | C30 | C29 | 1 | 3.3400  | 2.0 | 180.000000 |
| IMPROPER | H36 | C26 | C32 | C31 | 1 | 3.3400  | 2.0 | 180.000000 |
| IMPROPER | H38 | C27 | C33 | C28 | 1 | 3.3400  | 2.0 | 180.000000 |
| IMPROPER | H43 | N2  | C10 | C9  | 1 | 4.8267  | 2.0 | 180.000000 |
| IMPROPER | H47 | N4  | C13 | C12 | 1 | 4.8267  | 2.0 | 180.000000 |
| IMPROPER | H42 | N6  | C16 | C15 | 1 | 4.8267  | 2.0 | 180.000000 |
| IMPROPER | H45 | N18 | C24 | C30 | 1 | 4.8267  | 2.0 | 180.000000 |
| IMPROPER | H46 | N19 | C26 | C32 | 1 | 4.8267  | 2.0 | 180.000000 |
| IMPROPER | H44 | N20 | C27 | C33 | 1 | 4.8267  | 2.0 | 180.000000 |

Quintet

| bond | i1  | i2  | k        | R        |
|------|-----|-----|----------|----------|
| BOND | Fe1 | N2  | 120.0055 | 2.209972 |
| BOND | Fe1 | N4  | 120.0055 | 2.209972 |
| BOND | Fe1 | N6  | 120.0055 | 2.209972 |
| BOND | Fe1 | N18 | 120.0055 | 2.209972 |
| BOND | Fe1 | N20 | 120.0055 | 2.209972 |
| BOND | N19 | Fe1 | 120.0055 | 2.209972 |
| BOND | N2  | N3  | 155.4822 | 1.346206 |
| BOND | N4  | N5  | 155.4822 | 1.346206 |
| BOND | N6  | N7  | 155.4822 | 1.346206 |
| BOND | N18 | N23 | 155.4822 | 1.346206 |
| BOND | N19 | N25 | 155.4822 | 1.346206 |
| BOND | N20 | N22 | 155.4822 | 1.346206 |
| BOND | N2  | C10 | 249.8327 | 1.337455 |
| BOND | N4  | C13 | 249.8327 | 1.337455 |
| BOND | N6  | C16 | 249.8327 | 1.337455 |
| BOND | N18 | C24 | 249.8327 | 1.337455 |
| BOND | N19 | C26 | 249.8327 | 1.337455 |
| BOND | N20 | C27 | 249.8327 | 1.337455 |
| BOND | N3  | C8  | 239.5794 | 1.347595 |
| BOND | N5  | C11 | 239.5794 | 1.347595 |
| BOND | N7  | C14 | 239.5794 | 1.347595 |
| BOND | N22 | C28 | 239.5794 | 1.347595 |
| BOND | N23 | C29 | 239.5794 | 1.347595 |
| BOND | N25 | C31 | 239.5794 | 1.347595 |
| BOND | N3  | B17 | 149.4677 | 1.541661 |
| BOND | N5  | B17 | 149.4677 | 1.541661 |
| BOND | N7  | B21 | 149.4677 | 1.541661 |
| BOND | B17 | N22 | 149.4677 | 1.541661 |
| BOND | B21 | N23 | 149.4677 | 1.541661 |
| BOND | B21 | N25 | 149.4677 | 1.541661 |
| BOND | C8  | C9  | 367.8865 | 1.386359 |
| BOND | C11 | C12 | 367.8865 | 1.386359 |
| BOND | C14 | C15 | 367.8865 | 1.386359 |
| BOND | C28 | C33 | 367.8865 | 1.386359 |
| BOND | C29 | C30 | 367.8865 | 1.386359 |
| BOND | C31 | C32 | 367.8865 | 1.386359 |
| BOND | C8  | H49 | 404.2351 | 1.083381 |
| BOND | C11 | H48 | 404.2351 | 1.083381 |
| BOND | C14 | H52 | 404.2351 | 1.083381 |
| BOND | C28 | H50 | 404.2351 | 1.083381 |
| BOND | C29 | H53 | 404.2351 | 1.083381 |
| BOND | C31 | H51 | 404.2351 | 1.083381 |
| BOND | C9  | C10 | 234.1878 | 1.398562 |
| BOND | C12 | C13 | 234.1878 | 1.398562 |
| BOND | C15 | C16 | 234.1878 | 1.398562 |
| BOND | C24 | C30 | 234.1878 | 1.398562 |
| BOND | C26 | C32 | 234.1878 | 1.398562 |
| BOND | C27 | C33 | 234.1878 | 1.398562 |
| BOND | C9  | H39 | 408.0013 | 1.083711 |
| BOND | C12 | H41 | 408.0013 | 1.083711 |
| BOND | C15 | H40 | 408.0013 | 1.083711 |
| BOND | C30 | H37 | 408.0013 | 1.083711 |
| BOND | C32 | H36 | 408.0013 | 1.083711 |
| BOND | C33 | H38 | 408.0013 | 1.083711 |
| BOND | C10 | H43 | 401.5456 | 1.083641 |

Supplementary Material (ESI) for PCCP  
This journal is © the Owner Societies 2011

|       |     |     |     |          |            |
|-------|-----|-----|-----|----------|------------|
| BOND  | C13 | H47 |     | 401.5456 | 1.083641   |
| BOND  | C16 | H42 |     | 401.5456 | 1.083641   |
| BOND  | C24 | H45 |     | 401.5456 | 1.083641   |
| BOND  | C26 | H46 |     | 401.5456 | 1.083641   |
| BOND  | C27 | H44 |     | 401.5456 | 1.083641   |
| BOND  | B17 | H35 |     | 246.7146 | 1.204167   |
| BOND  | B21 | H34 |     | 246.7146 | 1.204167   |
| angle | i1  | i2  | i3  | k        | theta      |
| ANGLE | N18 | Fe1 | N6  | 196.2044 | 85.085129  |
| ANGLE | N19 | Fe1 | N18 | 196.2044 | 85.085129  |
| ANGLE | N19 | Fe1 | N6  | 196.2044 | 85.085129  |
| ANGLE | N20 | Fe1 | N2  | 196.2044 | 85.085129  |
| ANGLE | N20 | Fe1 | N4  | 196.2044 | 85.085129  |
| ANGLE | N4  | Fe1 | N2  | 196.2044 | 85.085129  |
| ANGLE | N18 | Fe1 | N4  | 178.9674 | 94.914871  |
| ANGLE | N19 | Fe1 | N2  | 178.9674 | 94.914871  |
| ANGLE | N19 | Fe1 | N20 | 178.9674 | 94.914871  |
| ANGLE | N20 | Fe1 | N18 | 178.9674 | 94.914871  |
| ANGLE | N6  | Fe1 | N2  | 178.9674 | 94.914871  |
| ANGLE | N6  | Fe1 | N4  | 178.9674 | 94.914871  |
| ANGLE | C10 | C9  | C8  | 164.0692 | 104.181489 |
| ANGLE | C13 | C12 | C11 | 164.0692 | 104.181489 |
| ANGLE | C16 | C15 | C14 | 164.0692 | 104.181489 |
| ANGLE | C28 | C33 | C27 | 164.0692 | 104.181489 |
| ANGLE | C29 | C30 | C24 | 164.0692 | 104.181489 |
| ANGLE | C31 | C32 | C26 | 164.0692 | 104.181489 |
| ANGLE | C10 | N2  | N3  | 120.6098 | 106.631946 |
| ANGLE | C13 | N4  | N5  | 120.6098 | 106.631946 |
| ANGLE | C16 | N6  | N7  | 120.6098 | 106.631946 |
| ANGLE | C24 | N18 | N23 | 120.6098 | 106.631946 |
| ANGLE | C26 | N19 | N25 | 120.6098 | 106.631946 |
| ANGLE | C27 | N20 | N22 | 120.6098 | 106.631946 |
| ANGLE | C12 | C11 | N5  | 140.5382 | 108.240442 |
| ANGLE | C15 | C14 | N7  | 140.5382 | 108.240442 |
| ANGLE | C30 | C29 | N23 | 140.5382 | 108.240442 |
| ANGLE | C32 | C31 | N25 | 140.5382 | 108.240442 |
| ANGLE | C33 | C28 | N22 | 140.5382 | 108.240442 |
| ANGLE | C9  | C8  | N3  | 140.5382 | 108.240442 |
| ANGLE | H34 | B21 | N23 | 43.3253  | 109.234141 |
| ANGLE | H34 | B21 | N25 | 43.3253  | 109.234141 |
| ANGLE | H34 | B21 | N7  | 43.3253  | 109.234141 |
| ANGLE | H35 | B17 | N22 | 43.3253  | 109.234141 |
| ANGLE | H35 | B17 | N3  | 43.3253  | 109.234141 |
| ANGLE | H35 | B17 | N5  | 43.3253  | 109.234141 |
| ANGLE | N22 | B17 | N3  | 107.9889 | 109.707256 |
| ANGLE | N22 | B17 | N5  | 107.9889 | 109.707256 |
| ANGLE | N23 | B21 | N7  | 107.9889 | 109.707256 |
| ANGLE | N25 | B21 | N23 | 107.9889 | 109.707256 |
| ANGLE | N25 | B21 | N7  | 107.9889 | 109.707256 |
| ANGLE | N5  | B17 | N3  | 107.9889 | 109.707256 |
| ANGLE | C11 | N5  | N4  | 83.5808  | 110.329746 |
| ANGLE | C14 | N7  | N6  | 83.5808  | 110.329746 |
| ANGLE | C28 | N22 | N20 | 83.5808  | 110.329746 |
| ANGLE | C29 | N23 | N18 | 83.5808  | 110.329746 |
| ANGLE | C31 | N25 | N19 | 83.5808  | 110.329746 |
| ANGLE | C8  | N3  | N2  | 83.5808  | 110.329746 |
| ANGLE | C12 | C13 | N4  | 95.6402  | 110.616377 |
| ANGLE | C15 | C16 | N6  | 95.6402  | 110.616377 |
| ANGLE | C30 | C24 | N18 | 95.6402  | 110.616377 |
| ANGLE | C32 | C26 | N19 | 95.6402  | 110.616377 |
| ANGLE | C33 | C27 | N20 | 95.6402  | 110.616377 |
| ANGLE | C9  | C10 | N2  | 95.6402  | 110.616377 |
| ANGLE | N22 | N20 | Fe1 | 136.3735 | 117.110707 |
| ANGLE | N23 | N18 | Fe1 | 136.3735 | 117.110707 |
| ANGLE | N25 | N19 | Fe1 | 136.3735 | 117.110707 |
| ANGLE | N3  | N2  | Fe1 | 136.3735 | 117.110707 |
| ANGLE | N5  | N4  | Fe1 | 136.3735 | 117.110707 |
| ANGLE | N7  | N6  | Fe1 | 136.3735 | 117.110707 |
| ANGLE | H42 | C16 | N6  | 25.3521  | 119.823702 |
| ANGLE | H43 | C10 | N2  | 25.3521  | 119.823702 |
| ANGLE | H44 | C27 | N20 | 25.3521  | 119.823702 |
| ANGLE | H45 | C24 | N18 | 25.3521  | 119.823702 |
| ANGLE | H46 | C26 | N19 | 25.3521  | 119.823702 |
| ANGLE | H47 | C13 | N4  | 25.3521  | 119.823702 |
| ANGLE | H48 | C11 | N5  | 35.4524  | 120.693228 |
| ANGLE | H49 | C8  | N3  | 35.4524  | 120.693228 |
| ANGLE | H50 | C28 | N22 | 35.4524  | 120.693228 |
| ANGLE | H51 | C31 | N25 | 35.4524  | 120.693228 |
| ANGLE | H52 | C14 | N7  | 35.4524  | 120.693228 |
| ANGLE | H53 | C29 | N23 | 35.4524  | 120.693228 |

Supplementary Material (ESI) for PCCP  
This journal is © the Owner Societies 2011

|          |     |     |     |     |   |          |        |            |
|----------|-----|-----|-----|-----|---|----------|--------|------------|
| ANGLE    | B17 | N3  | N2  |     |   | 91.8493  |        | 120.795366 |
| ANGLE    | B17 | N5  | N4  |     |   | 91.8493  |        | 120.795366 |
| ANGLE    | N20 | N22 | B17 |     |   | 91.8493  |        | 120.795366 |
| ANGLE    | B21 | N23 | N18 |     |   | 91.8493  |        | 120.795366 |
| ANGLE    | B21 | N25 | N19 |     |   | 91.8493  |        | 120.795366 |
| ANGLE    | B21 | N7  | N6  |     |   | 91.8493  |        | 120.795366 |
| ANGLE    | H36 | C32 | C31 |     |   | 33.9263  |        | 127.544449 |
| ANGLE    | H37 | C30 | C29 |     |   | 33.9263  |        | 127.544449 |
| ANGLE    | H38 | C33 | C28 |     |   | 33.9263  |        | 127.544449 |
| ANGLE    | H39 | C9  | C8  |     |   | 33.9263  |        | 127.544449 |
| ANGLE    | H40 | C15 | C14 |     |   | 33.9263  |        | 127.544449 |
| ANGLE    | H41 | C12 | C11 |     |   | 33.9263  |        | 127.544449 |
| ANGLE    | H36 | C32 | C26 |     |   | 33.4787  |        | 128.274062 |
| ANGLE    | H37 | C30 | C24 |     |   | 33.4787  |        | 128.274062 |
| ANGLE    | H38 | C33 | C27 |     |   | 33.4787  |        | 128.274062 |
| ANGLE    | H39 | C9  | C10 |     |   | 33.4787  |        | 128.274062 |
| ANGLE    | H40 | C15 | C16 |     |   | 33.4787  |        | 128.274062 |
| ANGLE    | H41 | C12 | C13 |     |   | 33.4787  |        | 128.274062 |
| ANGLE    | B17 | N3  | C8  |     |   | 103.6144 |        | 128.874889 |
| ANGLE    | B17 | N5  | C11 |     |   | 103.6144 |        | 128.874889 |
| ANGLE    | B21 | N7  | C14 |     |   | 103.6144 |        | 128.874889 |
| ANGLE    | C28 | N22 | B17 |     |   | 103.6144 |        | 128.874889 |
| ANGLE    | C29 | N23 | B21 |     |   | 103.6144 |        | 128.874889 |
| ANGLE    | C31 | N25 | B21 |     |   | 103.6144 |        | 128.874889 |
| ANGLE    | H42 | C16 | C15 |     |   | 36.5874  |        | 129.559920 |
| ANGLE    | H43 | C10 | C9  |     |   | 36.5874  |        | 129.559920 |
| ANGLE    | H44 | C27 | C33 |     |   | 36.5874  |        | 129.559920 |
| ANGLE    | H45 | C24 | C30 |     |   | 36.5874  |        | 129.559920 |
| ANGLE    | H46 | C26 | C32 |     |   | 36.5874  |        | 129.559920 |
| ANGLE    | H47 | C13 | C12 |     |   | 36.5874  |        | 129.559920 |
| ANGLE    | H48 | C11 | C12 |     |   | 32.3226  |        | 131.066330 |
| ANGLE    | H49 | C8  | C9  |     |   | 32.3226  |        | 131.066330 |
| ANGLE    | H50 | C28 | C33 |     |   | 32.3226  |        | 131.066330 |
| ANGLE    | H51 | C31 | C32 |     |   | 32.3226  |        | 131.066330 |
| ANGLE    | H52 | C14 | C15 |     |   | 32.3226  |        | 131.066330 |
| ANGLE    | H53 | C29 | C30 |     |   | 32.3226  |        | 131.066330 |
| ANGLE    | C10 | N2  | Fe1 |     |   | 145.8802 |        | 136.257347 |
| ANGLE    | C13 | N4  | Fe1 |     |   | 145.8802 |        | 136.257347 |
| ANGLE    | C16 | N6  | Fe1 |     |   | 145.8802 |        | 136.257347 |
| ANGLE    | C24 | N18 | Fe1 |     |   | 145.8802 |        | 136.257347 |
| ANGLE    | C26 | N19 | Fe1 |     |   | 145.8802 |        | 136.257347 |
| ANGLE    | C27 | N20 | Fe1 |     |   | 145.8802 |        | 136.257347 |
| dihedral | i1  | i2  | i3  | i4  |   |          | k divf | phi        |
| DIHEDRAL | C10 | C9  | C8  | N3  | 1 | 12.7484  | 1.0    | 0.000000   |
| DIHEDRAL | C13 | C12 | C11 | N5  | 1 | 12.7484  | 1.0    | 0.000000   |
| DIHEDRAL | C16 | C15 | C14 | N7  | 1 | 12.7484  | 1.0    | 0.000000   |
| DIHEDRAL | C26 | C32 | C31 | N25 | 1 | 12.7484  | 1.0    | 0.000000   |
| DIHEDRAL | C24 | C30 | C29 | N23 | 1 | 12.7484  | 1.0    | 0.000000   |
| DIHEDRAL | C27 | C33 | C28 | N22 | 1 | 12.7484  | 1.0    | 0.000000   |
| DIHEDRAL | C11 | C12 | C13 | N4  | 1 | 12.2571  | 1.0    | 0.000000   |
| DIHEDRAL | C8  | C9  | C10 | N2  | 1 | 12.2571  | 1.0    | 0.000000   |
| DIHEDRAL | C14 | C15 | C16 | N6  | 1 | 12.2571  | 1.0    | 0.000000   |
| DIHEDRAL | C28 | C33 | C27 | N20 | 1 | 12.2571  | 1.0    | 0.000000   |
| DIHEDRAL | C29 | C30 | C24 | N18 | 1 | 12.2571  | 1.0    | 0.000000   |
| DIHEDRAL | C31 | C32 | C26 | N19 | 1 | 12.2571  | 1.0    | 0.000000   |
| DIHEDRAL | C8  | N3  | N2  | C10 | 1 | 13.4638  | 1.0    | 0.000000   |
| DIHEDRAL | C11 | N5  | N4  | C13 | 1 | 13.4638  | 1.0    | 0.000000   |
| DIHEDRAL | C14 | N7  | N6  | C16 | 1 | 13.4638  | 1.0    | 0.000000   |
| DIHEDRAL | C28 | N22 | N20 | C27 | 1 | 13.4638  | 1.0    | 0.000000   |
| DIHEDRAL | C29 | N23 | N18 | C24 | 1 | 13.4638  | 1.0    | 0.000000   |
| DIHEDRAL | C31 | N25 | N19 | C26 | 1 | 13.4638  | 1.0    | 0.000000   |
| DIHEDRAL | C9  | C8  | N3  | N2  | 1 | 12.2631  | 1.0    | 0.000000   |
| DIHEDRAL | C12 | C11 | N5  | N4  | 1 | 12.2631  | 1.0    | 0.000000   |
| DIHEDRAL | C15 | C14 | N7  | N6  | 1 | 12.2631  | 1.0    | 0.000000   |
| DIHEDRAL | C30 | C29 | N23 | N18 | 1 | 12.2631  | 1.0    | 0.000000   |
| DIHEDRAL | C32 | C31 | N25 | N19 | 1 | 12.2631  | 1.0    | 0.000000   |
| DIHEDRAL | C33 | C28 | N22 | N20 | 1 | 12.2631  | 1.0    | 0.000000   |
| DIHEDRAL | C9  | C10 | N2  | N3  | 1 | 12.9817  | 1.0    | 0.000000   |
| DIHEDRAL | C12 | C13 | N4  | N5  | 1 | 12.9817  | 1.0    | 0.000000   |
| DIHEDRAL | C15 | C16 | N6  | N7  | 1 | 12.9817  | 1.0    | 0.000000   |
| DIHEDRAL | C30 | C24 | N18 | N23 | 1 | 12.9817  | 1.0    | 0.000000   |
| DIHEDRAL | C32 | C26 | N19 | N25 | 1 | 12.9817  | 1.0    | 0.000000   |
| DIHEDRAL | C33 | C27 | N20 | N22 | 1 | 12.9817  | 1.0    | 0.000000   |
| DIHEDRAL | B17 | N3  | N2  | Fe1 | 1 | 10.8660  | 1.0    | 0.000000   |
| DIHEDRAL | B17 | N22 | N20 | Fe1 | 1 | 10.8660  | 1.0    | 0.000000   |
| DIHEDRAL | B17 | N5  | N4  | Fe1 | 1 | 10.8660  | 1.0    | 0.000000   |
| DIHEDRAL | B21 | N23 | N18 | Fe1 | 1 | 10.8660  | 1.0    | 0.000000   |
| DIHEDRAL | B21 | N25 | N19 | Fe1 | 1 | 10.8660  | 1.0    | 0.000000   |
| DIHEDRAL | B21 | N7  | N6  | Fe1 | 1 | 10.8660  | 1.0    | 0.000000   |
| DIHEDRAL | C28 | N22 | B17 | H35 | 1 | 3.8593   | 1.0    | 0.000000   |

Supplementary Material (ESI) for PCCP  
 This journal is © the Owner Societies 2011

|          |     |     |     |     |   |         |     |            |
|----------|-----|-----|-----|-----|---|---------|-----|------------|
| DIHEDRAL | C29 | N23 | B21 | H34 | 1 | 3.8593  | 1.0 | 0.000000   |
| DIHEDRAL | C31 | N25 | B21 | H34 | 1 | 3.8593  | 1.0 | 0.000000   |
| DIHEDRAL | H34 | B21 | N7  | C14 | 1 | 3.8593  | 1.0 | 0.000000   |
| DIHEDRAL | H35 | B17 | N3  | C8  | 1 | 3.8593  | 1.0 | 0.000000   |
| DIHEDRAL | H35 | B17 | N5  | C11 | 1 | 3.8593  | 1.0 | 0.000000   |
| DIHEDRAL | H36 | C32 | C26 | H46 | 1 | 2.0399  | 1.0 | 360.000000 |
| DIHEDRAL | H37 | C30 | C24 | H45 | 1 | 2.0399  | 1.0 | 360.000000 |
| DIHEDRAL | H38 | C33 | C27 | H44 | 1 | 2.0399  | 1.0 | 360.000000 |
| DIHEDRAL | H42 | C16 | C15 | H40 | 1 | 2.0399  | 1.0 | 360.000000 |
| DIHEDRAL | H43 | C10 | C9  | H39 | 1 | 2.0399  | 1.0 | 360.000000 |
| DIHEDRAL | H47 | C13 | C12 | H41 | 1 | 2.0399  | 1.0 | 360.000000 |
| DIHEDRAL | H36 | C32 | C31 | H51 | 1 | 1.8451  | 1.0 | 360.000000 |
| DIHEDRAL | H37 | C30 | C29 | H53 | 1 | 1.8451  | 1.0 | 360.000000 |
| DIHEDRAL | H38 | C33 | C28 | H50 | 1 | 1.8451  | 1.0 | 360.000000 |
| DIHEDRAL | H39 | C9  | C8  | H49 | 1 | 1.8451  | 1.0 | 360.000000 |
| DIHEDRAL | H40 | C15 | C14 | H52 | 1 | 1.8451  | 1.0 | 360.000000 |
| DIHEDRAL | H41 | C12 | C11 | H48 | 1 | 1.8451  | 1.0 | 360.000000 |
| DIHEDRAL | H42 | C16 | N6  | Fe1 | 1 | 3.1442  | 1.0 | 360.000000 |
| DIHEDRAL | H43 | C10 | N2  | Fe1 | 1 | 3.1442  | 1.0 | 360.000000 |
| DIHEDRAL | H44 | C27 | N20 | Fe1 | 1 | 3.1442  | 1.0 | 360.000000 |
| DIHEDRAL | H45 | C24 | N18 | Fe1 | 1 | 3.1442  | 1.0 | 360.000000 |
| DIHEDRAL | H46 | C26 | N19 | Fe1 | 1 | 3.1442  | 1.0 | 360.000000 |
| DIHEDRAL | H47 | C13 | N4  | Fe1 | 1 | 3.1442  | 1.0 | 360.000000 |
| DIHEDRAL | H48 | C11 | N5  | B17 | 1 | 3.3589  | 1.0 | 360.000000 |
| DIHEDRAL | H49 | C8  | N3  | B17 | 1 | 3.3589  | 1.0 | 360.000000 |
| DIHEDRAL | H50 | C28 | N22 | B17 | 1 | 3.3589  | 1.0 | 360.000000 |
| DIHEDRAL | H51 | C31 | N25 | B21 | 1 | 3.3589  | 1.0 | 360.000000 |
| DIHEDRAL | H52 | C14 | N7  | B21 | 1 | 3.3589  | 1.0 | 360.000000 |
| DIHEDRAL | H53 | C29 | N23 | B21 | 1 | 3.3589  | 1.0 | 360.000000 |
| DIHEDRAL | C13 | N4  | Fe1 | N6  | 1 | 3.5433  | 1.0 | 42.736913  |
| DIHEDRAL | C16 | N6  | Fe1 | N4  | 1 | 3.5433  | 1.0 | 42.736913  |
| DIHEDRAL | N19 | Fe1 | N2  | C10 | 1 | 3.5433  | 1.0 | 42.736913  |
| DIHEDRAL | C24 | N18 | Fe1 | N20 | 1 | 3.5433  | 1.0 | 42.736913  |
| DIHEDRAL | C26 | N19 | Fe1 | N2  | 1 | 3.5433  | 1.0 | 42.736913  |
| DIHEDRAL | C27 | N20 | Fe1 | N18 | 1 | 3.5433  | 1.0 | 42.736913  |
| DIHEDRAL | N19 | Fe1 | N6  | N7  | 1 | 7.9079  | 1.0 | 42.736913  |
| DIHEDRAL | N22 | N20 | Fe1 | N2  | 1 | 7.9079  | 1.0 | 42.736913  |
| DIHEDRAL | N23 | N18 | Fe1 | N6  | 1 | 7.9079  | 1.0 | 42.736913  |
| DIHEDRAL | N25 | N19 | Fe1 | N18 | 1 | 7.9079  | 1.0 | 42.736913  |
| DIHEDRAL | N3  | N2  | Fe1 | N4  | 1 | 7.9079  | 1.0 | 42.736913  |
| DIHEDRAL | N5  | N4  | Fe1 | N20 | 1 | 7.9079  | 1.0 | 42.736913  |
| DIHEDRAL | N19 | N25 | B21 | N7  | 1 | 11.6485 | 1.0 | 60.291424  |
| DIHEDRAL | N20 | N22 | B17 | N5  | 1 | 11.6485 | 1.0 | 60.291424  |
| DIHEDRAL | N22 | B17 | N3  | N2  | 1 | 11.6485 | 1.0 | 60.291424  |
| DIHEDRAL | N23 | B21 | N7  | N6  | 1 | 11.6485 | 1.0 | 60.291424  |
| DIHEDRAL | N25 | B21 | N23 | N18 | 1 | 11.6485 | 1.0 | 60.291424  |
| DIHEDRAL | N4  | N5  | B17 | N3  | 1 | 11.6485 | 1.0 | 60.291424  |
| DIHEDRAL | N22 | B17 | N5  | C11 | 1 | 11.7635 | 1.0 | 119.708576 |
| DIHEDRAL | N25 | B21 | N7  | C14 | 1 | 11.7635 | 1.0 | 119.708576 |
| DIHEDRAL | C28 | N22 | B17 | N3  | 1 | 11.7635 | 1.0 | 119.708576 |
| DIHEDRAL | C29 | N23 | B21 | N7  | 1 | 11.7635 | 1.0 | 119.708576 |
| DIHEDRAL | C31 | N25 | B21 | N23 | 1 | 11.7635 | 1.0 | 119.708576 |
| DIHEDRAL | N5  | B17 | N3  | C8  | 1 | 11.7635 | 1.0 | 119.708576 |
| DIHEDRAL | C10 | N2  | Fe1 | N20 | 1 | 4.2135  | 1.0 | 137.263087 |
| DIHEDRAL | C13 | N4  | Fe1 | N2  | 1 | 4.2135  | 1.0 | 137.263087 |
| DIHEDRAL | C16 | N6  | Fe1 | N18 | 1 | 4.2135  | 1.0 | 137.263087 |
| DIHEDRAL | N19 | Fe1 | N18 | C24 | 1 | 4.2135  | 1.0 | 137.263087 |
| DIHEDRAL | C26 | N19 | Fe1 | N6  | 1 | 4.2135  | 1.0 | 137.263087 |
| DIHEDRAL | C27 | N20 | Fe1 | N4  | 1 | 4.2135  | 1.0 | 137.263087 |
| DIHEDRAL | N22 | N20 | Fe1 | N19 | 1 | 8.9050  | 1.0 | 137.263087 |
| DIHEDRAL | N23 | N18 | Fe1 | N4  | 1 | 8.9050  | 1.0 | 137.263087 |
| DIHEDRAL | N25 | N19 | Fe1 | N20 | 1 | 8.9050  | 1.0 | 137.263087 |
| DIHEDRAL | N3  | N2  | Fe1 | N6  | 1 | 8.9050  | 1.0 | 137.263087 |
| DIHEDRAL | N5  | N4  | Fe1 | N18 | 1 | 8.9050  | 1.0 | 137.263087 |
| DIHEDRAL | N7  | N6  | Fe1 | N2  | 1 | 8.9050  | 1.0 | 137.263087 |
| DIHEDRAL | C10 | C9  | C8  | H49 | 1 | 3.5267  | 1.0 | 180.000000 |
| DIHEDRAL | H51 | C31 | C32 | C26 | 1 | 3.5267  | 1.0 | 180.000000 |
| DIHEDRAL | C13 | C12 | C11 | H48 | 1 | 3.5267  | 1.0 | 180.000000 |
| DIHEDRAL | C16 | C15 | C14 | H52 | 1 | 3.5267  | 1.0 | 180.000000 |
| DIHEDRAL | H50 | C28 | C33 | C27 | 1 | 3.5267  | 1.0 | 180.000000 |
| DIHEDRAL | H53 | C29 | C30 | C24 | 1 | 3.5267  | 1.0 | 180.000000 |
| DIHEDRAL | C11 | N5  | N4  | Fe1 | 1 | 15.1662 | 1.0 | 180.000000 |
| DIHEDRAL | C14 | N7  | N6  | Fe1 | 1 | 15.1662 | 1.0 | 180.000000 |
| DIHEDRAL | C28 | N22 | N20 | Fe1 | 1 | 15.1662 | 1.0 | 180.000000 |
| DIHEDRAL | C29 | N23 | N18 | Fe1 | 1 | 15.1662 | 1.0 | 180.000000 |
| DIHEDRAL | C31 | N25 | N19 | Fe1 | 1 | 15.1662 | 1.0 | 180.000000 |
| DIHEDRAL | C8  | N3  | N2  | Fe1 | 1 | 15.1662 | 1.0 | 180.000000 |
| DIHEDRAL | C12 | C11 | N5  | B17 | 1 | 15.3220 | 1.0 | 180.000000 |
| DIHEDRAL | C9  | C8  | N3  | B17 | 1 | 15.3220 | 1.0 | 180.000000 |
| DIHEDRAL | C15 | C14 | N7  | B21 | 1 | 15.3220 | 1.0 | 180.000000 |

Supplementary Material (ESI) for PCCP  
This journal is © the Owner Societies 2011

|          |     |     |     |     |   |         |     |            |
|----------|-----|-----|-----|-----|---|---------|-----|------------|
| DIHEDRAL | C30 | C29 | N23 | B21 | 1 | 15.3220 | 1.0 | 180.000000 |
| DIHEDRAL | C32 | C31 | N25 | B21 | 1 | 15.3220 | 1.0 | 180.000000 |
| DIHEDRAL | C33 | C28 | N22 | B17 | 1 | 15.3220 | 1.0 | 180.000000 |
| DIHEDRAL | C12 | C13 | N4  | Fe1 | 1 | 8.1759  | 1.0 | 180.000000 |
| DIHEDRAL | C15 | C16 | N6  | Fe1 | 1 | 8.1759  | 1.0 | 180.000000 |
| DIHEDRAL | C30 | C24 | N18 | Fe1 | 1 | 8.1759  | 1.0 | 180.000000 |
| DIHEDRAL | C32 | C26 | N19 | Fe1 | 1 | 8.1759  | 1.0 | 180.000000 |
| DIHEDRAL | C33 | C27 | N20 | Fe1 | 1 | 8.1759  | 1.0 | 180.000000 |
| DIHEDRAL | C9  | C10 | N2  | Fe1 | 1 | 8.1759  | 1.0 | 180.000000 |
| DIHEDRAL | B17 | N3  | N2  | C10 | 1 | 17.6121 | 1.0 | 180.000000 |
| DIHEDRAL | B17 | N5  | N4  | C13 | 1 | 17.6121 | 1.0 | 180.000000 |
| DIHEDRAL | B21 | N23 | N18 | C24 | 1 | 17.6121 | 1.0 | 180.000000 |
| DIHEDRAL | B21 | N25 | N19 | C26 | 1 | 17.6121 | 1.0 | 180.000000 |
| DIHEDRAL | B21 | N7  | N6  | C16 | 1 | 17.6121 | 1.0 | 180.000000 |
| DIHEDRAL | C27 | N20 | N22 | B17 | 1 | 17.6121 | 1.0 | 180.000000 |
| DIHEDRAL | N20 | N22 | B17 | H35 | 1 | 5.7732  | 1.0 | 180.000000 |
| DIHEDRAL | H34 | B21 | N23 | N18 | 1 | 5.7732  | 1.0 | 180.000000 |
| DIHEDRAL | H34 | B21 | N25 | N19 | 1 | 5.7732  | 1.0 | 180.000000 |
| DIHEDRAL | H34 | B21 | N7  | N6  | 1 | 5.7732  | 1.0 | 180.000000 |
| DIHEDRAL | H35 | B17 | N3  | N2  | 1 | 5.7732  | 1.0 | 180.000000 |
| DIHEDRAL | H35 | B17 | N5  | N4  | 1 | 5.7732  | 1.0 | 180.000000 |
| DIHEDRAL | C28 | C33 | C27 | H44 | 1 | 4.0944  | 1.0 | 180.000000 |
| DIHEDRAL | C29 | C30 | C24 | H45 | 1 | 4.0944  | 1.0 | 180.000000 |
| DIHEDRAL | C31 | C32 | C26 | H46 | 1 | 4.0944  | 1.0 | 180.000000 |
| DIHEDRAL | H42 | C16 | C15 | C14 | 1 | 4.0944  | 1.0 | 180.000000 |
| DIHEDRAL | H43 | C10 | C9  | C8  | 1 | 4.0944  | 1.0 | 180.000000 |
| DIHEDRAL | H47 | C13 | C12 | C11 | 1 | 4.0944  | 1.0 | 180.000000 |
| DIHEDRAL | H36 | C32 | C26 | N19 | 1 | 3.4380  | 1.0 | 180.000000 |
| DIHEDRAL | H37 | C30 | C24 | N18 | 1 | 3.4380  | 1.0 | 180.000000 |
| DIHEDRAL | H38 | C33 | C27 | N20 | 1 | 3.4380  | 1.0 | 180.000000 |
| DIHEDRAL | H39 | C9  | C10 | N2  | 1 | 3.4380  | 1.0 | 180.000000 |
| DIHEDRAL | H40 | C15 | C16 | N6  | 1 | 3.4380  | 1.0 | 180.000000 |
| DIHEDRAL | H41 | C12 | C13 | N4  | 1 | 3.4380  | 1.0 | 180.000000 |
| DIHEDRAL | H36 | C32 | C31 | N25 | 1 | 3.5614  | 1.0 | 180.000000 |
| DIHEDRAL | H37 | C30 | C29 | N23 | 1 | 3.5614  | 1.0 | 180.000000 |
| DIHEDRAL | H38 | C33 | C28 | N22 | 1 | 3.5614  | 1.0 | 180.000000 |
| DIHEDRAL | H39 | C9  | C8  | N3  | 1 | 3.5614  | 1.0 | 180.000000 |
| DIHEDRAL | H40 | C15 | C14 | N7  | 1 | 3.5614  | 1.0 | 180.000000 |
| DIHEDRAL | H41 | C12 | C11 | N5  | 1 | 3.5614  | 1.0 | 180.000000 |
| DIHEDRAL | H42 | C16 | N6  | N7  | 1 | 4.7141  | 1.0 | 180.000000 |
| DIHEDRAL | H45 | C24 | N18 | N23 | 1 | 4.7141  | 1.0 | 180.000000 |
| DIHEDRAL | H48 | C11 | N5  | N4  | 1 | 4.7141  | 1.0 | 180.000000 |
| DIHEDRAL | H49 | C8  | N3  | N2  | 1 | 4.7141  | 1.0 | 180.000000 |
| DIHEDRAL | H50 | C28 | N22 | N20 | 1 | 4.7141  | 1.0 | 180.000000 |
| DIHEDRAL | H51 | C31 | N25 | N19 | 1 | 4.7141  | 1.0 | 180.000000 |
| DIHEDRAL | H43 | C10 | N2  | N3  | 1 | 4.9576  | 1.0 | 180.000000 |
| DIHEDRAL | H44 | C27 | N20 | N22 | 1 | 4.9576  | 1.0 | 180.000000 |
| DIHEDRAL | H46 | C26 | N19 | N25 | 1 | 4.9576  | 1.0 | 180.000000 |
| DIHEDRAL | H47 | C13 | N4  | N5  | 1 | 4.9576  | 1.0 | 180.000000 |
| DIHEDRAL | H52 | C14 | N7  | N6  | 1 | 4.9576  | 1.0 | 180.000000 |
| DIHEDRAL | H53 | C29 | N23 | N18 | 1 | 4.9576  | 1.0 | 180.000000 |
| DIHEDRAL | C10 | N2  | Fe1 | N4  | 1 | 4.2130  | 1.0 | 222.736913 |
| DIHEDRAL | C13 | N4  | Fe1 | N20 | 1 | 4.2130  | 1.0 | 222.736913 |
| DIHEDRAL | N19 | Fe1 | N6  | C16 | 1 | 4.2130  | 1.0 | 222.736913 |
| DIHEDRAL | C24 | N18 | Fe1 | N6  | 1 | 4.2130  | 1.0 | 222.736913 |
| DIHEDRAL | C26 | N19 | Fe1 | N18 | 1 | 4.2130  | 1.0 | 222.736913 |
| DIHEDRAL | C27 | N20 | Fe1 | N2  | 1 | 4.2130  | 1.0 | 222.736913 |
| DIHEDRAL | N19 | Fe1 | N2  | N3  | 1 | 8.9054  | 1.0 | 222.736913 |
| DIHEDRAL | N22 | N20 | Fe1 | N18 | 1 | 8.9054  | 1.0 | 222.736913 |
| DIHEDRAL | N23 | N18 | Fe1 | N20 | 1 | 8.9054  | 1.0 | 222.736913 |
| DIHEDRAL | N25 | N19 | Fe1 | N2  | 1 | 8.9054  | 1.0 | 222.736913 |
| DIHEDRAL | N5  | N4  | Fe1 | N6  | 1 | 8.9054  | 1.0 | 222.736913 |
| DIHEDRAL | N7  | N6  | Fe1 | N4  | 1 | 8.9054  | 1.0 | 222.736913 |
| DIHEDRAL | C11 | N5  | B17 | N3  | 1 | 11.7621 | 1.0 | 240.291424 |
| DIHEDRAL | N22 | B17 | N3  | C8  | 1 | 11.7621 | 1.0 | 240.291424 |
| DIHEDRAL | N23 | B21 | N7  | C14 | 1 | 11.7621 | 1.0 | 240.291424 |
| DIHEDRAL | C28 | N22 | B17 | N5  | 1 | 11.7621 | 1.0 | 240.291424 |
| DIHEDRAL | C29 | N23 | B21 | N25 | 1 | 11.7621 | 1.0 | 240.291424 |
| DIHEDRAL | C31 | N25 | B21 | N7  | 1 | 11.7621 | 1.0 | 240.291424 |
| DIHEDRAL | N18 | N23 | B21 | N7  | 1 | 11.6482 | 1.0 | 299.708576 |
| DIHEDRAL | N20 | N22 | B17 | N3  | 1 | 11.6482 | 1.0 | 299.708576 |
| DIHEDRAL | N22 | B17 | N5  | N4  | 1 | 11.6482 | 1.0 | 299.708576 |
| DIHEDRAL | N23 | B21 | N25 | N19 | 1 | 11.6482 | 1.0 | 299.708576 |
| DIHEDRAL | N25 | B21 | N7  | N6  | 1 | 11.6482 | 1.0 | 299.708576 |
| DIHEDRAL | N5  | B17 | N3  | N2  | 1 | 11.6482 | 1.0 | 299.708576 |
| DIHEDRAL | C10 | N2  | Fe1 | N6  | 1 | 3.5431  | 1.0 | 317.263087 |
| DIHEDRAL | C13 | N4  | Fe1 | N18 | 1 | 3.5431  | 1.0 | 317.263087 |
| DIHEDRAL | C16 | N6  | Fe1 | N2  | 1 | 3.5431  | 1.0 | 317.263087 |
| DIHEDRAL | C24 | N18 | Fe1 | N4  | 1 | 3.5431  | 1.0 | 317.263087 |
| DIHEDRAL | C26 | N19 | Fe1 | N20 | 1 | 3.5431  | 1.0 | 317.263087 |

Supplementary Material (ESI) for PCCP  
 This journal is © the Owner Societies 2011

|          |     |     |     |     |   |         |     |            |
|----------|-----|-----|-----|-----|---|---------|-----|------------|
| DIHEDRAL | C27 | N20 | Fe1 | N19 | 1 | 3.5431  | 1.0 | 317.263087 |
| DIHEDRAL | N19 | Fe1 | N18 | N23 | 1 | 7.9076  | 1.0 | 317.263087 |
| DIHEDRAL | N22 | N20 | Fe1 | N4  | 1 | 7.9076  | 1.0 | 317.263087 |
| DIHEDRAL | N25 | N19 | Fe1 | N6  | 1 | 7.9076  | 1.0 | 317.263087 |
| DIHEDRAL | N5  | N4  | Fe1 | N2  | 1 | 7.9076  | 1.0 | 317.263087 |
| DIHEDRAL | N7  | N6  | Fe1 | N18 | 1 | 7.9076  | 1.0 | 317.263087 |
| DIHEDRAL | N3  | N2  | Fe1 | N20 | 1 | 7.9076  | 1.0 | 317.263087 |
| improper | i1  | i2  | i3  | i4  |   |         |     | k divf phi |
| IMPROPER | C10 | Fe1 | N2  | N3  | 1 | 6.3484  | 2.0 | 180.000000 |
| IMPROPER | C13 | Fe1 | N4  | N5  | 1 | 6.3484  | 2.0 | 180.000000 |
| IMPROPER | C16 | Fe1 | N6  | N7  | 1 | 6.3484  | 2.0 | 180.000000 |
| IMPROPER | C24 | Fe1 | N18 | N23 | 1 | 6.3484  | 2.0 | 180.000000 |
| IMPROPER | C26 | Fe1 | N19 | N25 | 1 | 6.3484  | 2.0 | 180.000000 |
| IMPROPER | C27 | Fe1 | N20 | N22 | 1 | 6.3484  | 2.0 | 180.000000 |
| IMPROPER | B17 | N2  | N3  | C8  | 1 | 10.4360 | 2.0 | 180.000000 |
| IMPROPER | B17 | N4  | N5  | C11 | 1 | 10.4360 | 2.0 | 180.000000 |
| IMPROPER | B17 | N20 | N22 | C28 | 1 | 10.4360 | 2.0 | 180.000000 |
| IMPROPER | B21 | N6  | N7  | C14 | 1 | 10.4360 | 2.0 | 180.000000 |
| IMPROPER | B21 | N18 | N23 | C29 | 1 | 10.4360 | 2.0 | 180.000000 |
| IMPROPER | B21 | N19 | N25 | C31 | 1 | 10.4360 | 2.0 | 180.000000 |
| IMPROPER | H49 | C9  | C8  | N3  | 1 | 3.5273  | 2.0 | 180.000000 |
| IMPROPER | H48 | C12 | C11 | N5  | 1 | 3.5273  | 2.0 | 180.000000 |
| IMPROPER | H52 | C15 | C14 | N7  | 1 | 3.5273  | 2.0 | 180.000000 |
| IMPROPER | H50 | C33 | C28 | N22 | 1 | 3.5273  | 2.0 | 180.000000 |
| IMPROPER | H53 | C30 | C29 | N23 | 1 | 3.5273  | 2.0 | 180.000000 |
| IMPROPER | H51 | C32 | C31 | N25 | 1 | 3.5273  | 2.0 | 180.000000 |
| IMPROPER | H39 | C10 | C9  | C8  | 1 | 3.6459  | 2.0 | 180.000000 |
| IMPROPER | H41 | C13 | C12 | C11 | 1 | 3.6459  | 2.0 | 180.000000 |
| IMPROPER | H40 | C16 | C15 | C14 | 1 | 3.6459  | 2.0 | 180.000000 |
| IMPROPER | H37 | C24 | C30 | C29 | 1 | 3.6459  | 2.0 | 180.000000 |
| IMPROPER | H36 | C26 | C32 | C31 | 1 | 3.6459  | 2.0 | 180.000000 |
| IMPROPER | H38 | C27 | C33 | C28 | 1 | 3.6459  | 2.0 | 180.000000 |
| IMPROPER | H43 | N2  | C10 | C9  | 1 | 5.6038  | 2.0 | 180.000000 |
| IMPROPER | H47 | N4  | C13 | C12 | 1 | 5.6038  | 2.0 | 180.000000 |
| IMPROPER | H42 | N6  | C16 | C15 | 1 | 5.6038  | 2.0 | 180.000000 |
| IMPROPER | H45 | N18 | C24 | C30 | 1 | 5.6038  | 2.0 | 180.000000 |
| IMPROPER | H46 | N19 | C26 | C32 | 1 | 5.6038  | 2.0 | 180.000000 |
| IMPROPER | H44 | N20 | C27 | C33 | 1 | 5.6038  | 2.0 | 180.000000 |
